# Supplementary material for: Improved use of a public good selects for the evolution of undifferentiated multicellularity
Source: eLife. 2013 Apr 2;2:e00367. doi: 10.7554/eLife.00367 (PMC3614033; doi:10.7554/eLife.00367)
Supplement: Supplementary file 1. — (A) Genes whose expression changed significantly in nine or more evolved clones. (B) Genes whose expression was increased or reduced at least tenfold. (C) All genes whose expression changed significantly in any clone or the control strain. Values are log2 change from ancestor to sample strain. Genes whose value did not change significantly are shown as zero. DOI: http://dx.doi.org/10.7554/eLife.00367.024 [file elife00367s001.xlsx]

## Sheet: A
Supplementary File 1A: Genes whose expression changed significantly in nine or more evolved clones
Gene	Number of evolved clones	Increased or reduced	Function
LPX1	12	increased	Peroxisomal matrix localized lipase
GNP1	10	increased	High-affinity glutamine permease
HXT4	10	increased	High-affinity glucose transporter
SPL2	10	increased	Phosphate transport regulation
SUC2	10	increased	Invertase
WHI5	10	increased	G1 transcription repressor, binds to SBF in early G1
STL1	9	increased	Glycerol proton symporter
YAT1	9	increased	Outer mitochondrial carnitine acetyltransferase
YKR075C	9	increased	Protein of unknown function
YLR311C	9	increased	Dubious open reading frame
YMR001C-A	9	increased	Putative protein of unknown function
MFa1	12	reduced	Mating, alpha-factor pheromone
BAR1	12	reduced	Mating, protease secreted by MATa cells
STE2	11	reduced	Mating, alpha-factor receptor
YFR006W	11	reduced	Putative X-Pro aminopeptidase
ANS1	10	reduced	Putative protein of unknown function
FUI1	10	reduced	High affinity uridine permease
MFA2	10	reduced	Mating, a-factor pheromone
SAD1	10	reduced	Pre-mRNA splicing, zinc-finger domain protein
CTP1	9	reduced	Mitochondrial citrate transporter
MFA1	9	reduced	Mating pheromone a-factor
MPD1	9	reduced	Protein disulfide isomerase
RME1	9	reduced	Meiotic regulation
TIM10	9	reduced	Protein import into mitochondrial inner membrane
YMR118C	9	reduced	Putative mitochondrial protein of unknown function
This table does not include cell separation genes shown in Table 3.

## Sheet: B
Supplementary File 1B: Genes whose expression was increased or reduced at least tenfold
Strain name	Other genes whose expression increased at least tenfold	Genes whose expression was reduced at least tenfold
EvoClone1	ADY2, ANB1, CIT3, CRC1, DAN1, DIP5, FBP1, ICL1, ICL2, MLS1, PAU20, PCK1, TIR2, ZRT1	ANS1, CTS1, DSE1, DSE2, ENO2, GND1, TDH1
EvoClone2	CRC1, ICL1, MLS1, PCK1, YAT1	ADH1, ANS1, BDS1, CTS1, DSE1, DSE2, ENO1, ENO2, FBA1, GND2, GPM1, MET14, MET17, MET3, MFα1, MHT1, PDC1, PDC6, SAM2, SCW11, SUL1, TDH1, TDH2, TKL2, TPI1
EvoClone3	CDA2, CRC1, FMP23, ICL1, MLS1, PCK1, PHO84, PHO89, SPL2, YAT1	CTS1, CTT1, DSE1, DSE2, ENO2, GRE1, HO, MATα2, YGP1
EvoClone4	ADY2, CIT3, CSM4, CTA1, ECI1, FDH1, FDH2, HEF3, HSP30, LSR1, NAT4, POT1, RGI2, SNR19 SNR55, SNR57, SPG1, SPS19, SRL4, SSA3, ZRT1	ACO2, ADO1, ALD5, AMN1, ARO8, ASN1, BAT1, CCW12, CDS1, CIS3, CTS1, CYC1, DSE1, DSE2, EHT1, EPT1, ERG26, ERG3, ERG4, ERG5, GAS1, GGC1, GND1, HO, INO1, LYS1, LYS4, LYS9, MEP2, MET3, PMA1, PSA1, PSD1, RNR1, SAH1, SAM2, SCW11, SCW4, SFG1, SPS4, SUR4, TKL1, UTR2, YHB1,
EvoClone5	CTA1, GRE1, HEF3, HSP30, LSR1, OPT1, POT1, RGI2, SNR19, SPG1, SPG4, SSA3, ZRT1	ACO2, AMN1, ANS1, ARG3, BAR1, CCW12, CIS3, CLB2, CRH1, CTS1, CWP1, CWP2, CYC1, DSE1, DSE2, DSE4, EGT2, EHT1, ERG4, ERG5, GAS1, GND1, HO, HTA2, HTB2, IDH2, INO1, LEU2, LYS9, MCD1, MEP2, MFα1, PCL1, PMA1, PSD1, PST1, RNR1, SAH1, SAM2, SCW4, SRL1, SUN4, SUR7, SWI5, TKL1, TOS1, TOS4, TOS6, UTR2, YHB1
EvoClone6	ADH2, ADY2 CSM4, CTA1, DAK2, FDH1, FDH2, FOX2, GAT3, GNP1, HEF3, HPF1, HSP30, NRG1, PAU19 PAU3, POT1, POX1, RGI2, RRT1, SGA1, SNR19, SNR34, SPG1, SPG4, SRT1, SSA3, ZPS1, ZRT1	ACO2, ADE17, ANS1, ARG3, ARO8, ASN1, BAR1, BUD28, CPA2, CTS1, CYC1, CYS3, DAL1, DBP2, DSE1, DSE2, ERG3, ERG4, ERG5, FCJ1, FCY2, FIG1, GGC1, HAP4, HES1, HO, HOM3, IMD4, INO1, LEU2, LYS1, LYS4, LYS9, MET6, MFα1, ODC2, RPL9A, RPS22A, RPS26B, SAH1, SAM1, SAM2, SFG1, SHM2, SNR63, SPS4, SUR4, TKL1, URA7, UTR2, YHB1, YHM2
EvoClone7A	FBP1, PCK1	ALD3, ANS1, CTS1, CTT1, DSE1, DSE2, ENO2, GPM1, GRE1, HSP26, SCW11, SSA3, TDH1, TDH2, TKL2
EvoClone7B		ANS1, GRE1, HSP26, MFA1, NDJ1, OSW1, PDC6, SPS100, SSA3, TKL2
EvoClone7C	AQY2, CRC1, FBP1, GDH3, HXT3, HXT4, ICL1, LPX1, MLS1, PCK1, YAT1	ALD3, ANS1, CTS1, CTT1, DSE1, DSE2, ENO1, ENO2, GND2, GPH1, GPM1, GRE1, HSP12, MSC1, SCW11, SIP18, TDH1, TDH2, TDH3, TKL2
EvoClone8	AQY2, ARG1, CRC1, DIP5, FMP23, HPF1, ICL1, IME1, MGA1, MLS1, PCK1, SRL4, YAT1	ANS1, CTS1, GND1
EvoClone9	HPF1	CTS1, DSE1, DSE2, MATa2, SCW11, SPS4, YGP1
EvoClone10	ANB1, CIT3, CTA1, DAN1, ECM23, ERR1, ERR2, ERR3, FDH1, FDH2, GRE1, HEF3, HPF1, HSP30, HUG1, NAT4, PDC6, PMA2, POT1, RGI2, SIP18, SNR19, SNR190, SNR55, SNR57, SPG1, SSA3	ACO2, CYC1, EPT1, FEN1, GDH1, INO1, LEU2, LYS9, MAL11, MEP2, NDJ1, RPL9A, RPS22A, RPS26B, SAH1, SAM2, TKL1, UTR2, YHB1

## Sheet: C
Supplementary File 1C: All genes whose expression changed significantly in any clone or the control strain.
Values are log2 change from ancestor to sample strain. Genes whose value did not change significantly are shown as zero.
gene_id	gene_name	Control	EvoClone1	EvoClone2	EvoClone3	EvoClone4	EvoClone5	EvoClone6	EvoClone7A	EvoClone7B	EvoClone7C	EvoClone8	EvoClone9	EvoClone10
LSR1	LSR1	0	0	0	0	3.49361	3.53527	2.86997	0	0	0	0	1.5363	2.92522
NME1	NME1	0	0	2.73969	0	2.70102	0	0	0	0	0	0	0	2.99766
RPR1	RPR1	0	0	0	0	2.5432	0	0	0	0	0	0	0	0
RUF5-1	RUF5-1	0	0	0	0	0	0	0	0	-1.89655	0	0	0	0
RUF5-2	RUF5-2	0	0	0	0	0	0	0	0	-1.88059	0	0	0	0
SCR1	SCR1	0	0	2.51066	0	0	0	0	0	0	0	0	0	0
TLC1	TLC1	0	0	0	0	0	-2.22555	0	0	0	0	0	0	0
YAL003W	EFB1	0	0	0	0	-2.6153	0	-2.49484	0	0	0	-1.89052	0	-2.43154
YAL007C	ERP2	0	0	0	0	-2.51783	-2.21401	-1.94886	0	0	0	0	0	0
YAL008W	FUN14	0	0	-1.41592	0	0	0	0	0	0	0	0	0	0
YAL012W	CYS3	0	0	-1.68841	0	-2.94666	0	-3.36925	0	0	0	-2.25732	0	0
YAL018C		0	0	0	0	0	0	-2.6068	0	0	0	0	0	0
YAL023C	PMT2	0	0	0	0	-2.24931	0	0	0	0	0	0	0	-2.26558
YAL025C	MAK16	0	0	0	0	0	0	-2.1112	0	0	0	0	0	0
YAL028W	FRT2	0	0	0	0	2.42167	2.20647	1.9486	0	0	0	0	1.15201	1.96263
YAL034C	FUN19	0	0	0	0	1.94839	1.96925	2.07436	0	0	0	0	0	2.17797
YAL039C	CYC3	0	-1.5179	0	-1.21251	0	0	0	0	0	0	0	0	0
YAL040C	CLN3	0	1.89644	0	0	0	0	0	0	0	0	1.82324	0	0
YAL044C	GCV3	0	0	0	-1.40867	0	0	0	0	0	0	-1.58934	0	0
YAL054C	ACS1	0	0	0	0	0	0	2.7611	0	0	0	0	1.96952	0
YAL060W	BDH1	0	0	-2.38174	0	0	0	0	0	0	0	0	0	0
YAL061W	BDH2	0	0	-1.64703	-1.27386	0	0	0	-1.6944	0	-1.62972	0	-1.15974	0
YAL062W	GDH3	0	3.25252	0	0	2.76591	0	0	0	0	3.36549	2.39537	0	0
YAL063C-A		0	0	0	0	0	0	0	0	0	0	2.0533	0	0
YAL064W		0	0	0	0	0	0	0	0	0	0	2.82249	0	0
YAL066W		0	0	0	0	2.98257	0	0	0	0	0	0	0	0
YAL067C	SEO1	0	0	-2.71126	0	0	0	-2.25857	-0.973509	-1.62167	0	0	-1.19192	0
YAL068C	PAU8	0	2.40739	0	0	0	0	0	0	0	0	0	0	0
YAR002C-A	ERP1	0	0	-1.54882	0	0	0	0	0	0	0	0	0	0
YAR009C		0	0	0	0	0	0	0	0	-1.36387	0	0	0	0
YAR015W	ADE1	0	0	0	0	0	0	-2.38736	0	0	0	0	0	-2.09385
YAR018C	KIN3	0	0	0	0	0	-2.41542	0	0	0	0	0	0	0
YAR035C-A		0	0	4.89519	0	0	0	0	0	0	0	0	0	0
YAR035W	YAT1	0	2.87163	4.47649	3.93426	2.36272	0	0	3.18287	0	4.03331	3.85823	1.42242	2.66436
YAR050W	FLO1	0	0	0	0	0	1.76631	0	0	0	1.19379	0	0	0
YAR066W		0	2.0674	0	2.20171	2.20126	0	2.50777	1.46958	2.17483	1.5873	0	3.22634	0
YAR068W		0	1.94733	0	1.94319	2.12702	0	2.35058	0	2.03103	0	0	3.17534	0
YAR069C		0	0	-3.16116	0	0	0	0	-1.91295	0	0	0	0	0
YAR070C		0	0	-3.41515	0	0	0	0	0	0	0	0	0	0
YAR071W	PHO11	0	0	0	1.23364	0	0	0	0	0.980094	0	0	0	0
YAR073W	IMD1	0	0	-3.28522	0	0	0	-3.22563	0	0	0	-2.04676	0	0
YAR075W		0	0	-3.23393	0	0	0	0	0	0	0	0	0	0
YBL001C	ECM15	0.32168	0	0	0	0	0	0	0	0	0	0	0	0
YBL002W	HTB2	0	0	0	-1.66869	-3.29745	-3.53324	0	0	0	0	0	-1.95255	-2.73594
YBL003C	HTA2	0	0	0	-1.93078	-2.98666	-4.07162	0	0	0	0	0	-1.45284	-3.15554
YBL009W	ALK2	0	0	0	0	0	-2.10378	0	0	0	0	0	0	0
YBL016W	FUS3	0	1.27211	0	0	0	0	0	0	0	0	0	0	0
YBL024W	NCL1	0	0	0	0	0	0	0	0	0	0	0	0	-1.91779
YBL030C	PET9	0	0	0	0	-3.24701	-2.90975	-3.19749	0	0	0	0	0	-2.76983
YBL031W	SHE1	0	0	0	0	-2.37971	-2.77534	0	0	0	0	0	0	0
YBL039C	URA7	0	-1.17529	0	-1.23447	-2.77542	-2.59926	-3.72866	0	0	0	0	-1.24573	-2.38151
YBL042C	FUI1	0	-2.91361	-1.61285	-2.14182	-2.37961	-1.92223	-2.90327	-2.20733	-2.20894	0	-1.86204	-2.31935	0
YBL043W	ECM13	0	1.80013	2.43159	2.78304	0	0	0	1.953	1.00764	2.4517	1.69463	0	0
YBL048W	RRT1	0.764289	2.18155	0	2.66921	2.8128	3.31891	3.50714	0	0	0	1.90141	2.09273	2.3875
YBL049W	MOH1	0	0	0	1.20921	0	2.02724	2.17308	0	-1.11277	0	0	0	2.03864
YBL072C	RPS8A	0	0	0	-1.8896	0	0	0	0	0	0	0	0	0
YBL075C	SSA3	0	-1.81509	-1.93115	-3.20122	3.60471	3.3238	3.40895	-3.5143	-3.79481	-2.06359	-2.58786	0	4.99469
YBL078C	ATG8	0	0	0	0	0	0	1.83855	0	0	0	0	0	0
YBL081W		0	0	0	0	-3.09193	-2.77079	-2.45704	0	0	0	0	0	-2.23326
YBL087C	RPL23A	0	-1.7287	0	-2.091	-2.13968	-1.94002	-2.75746	0	0	0	-1.77408	-1.3836	-2.74593
YBL090W	MRP21	0	0	-1.30967	0	0	0	0	0	0	0	0	0	0
YBL092W	RPL32	0	0	0	-1.97152	0	0	-2.47009	0	0	0	0	0	-2.4338
YBL098W	BNA4	0	0	0	0	0	0	-2.46034	0	0	0	0	0	0
YBL100W-B		0	0	0	0	0	0	0	-1.64711	-1.0846	-2.11479	0	0	0
YBL103C	RTG3	0	0	1.32128	0	0	0	0	0	0	0	0	0	0
YBL107C		0	0	-1.46694	0	0	0	0	0	0	0	0	0	0
YBL107W-A		0	2.10182	0	2.30281	3.00891	0	0	0	2.2003	2.60526	0	0	0
YBR003W	COQ1	0	0	0	0	-2.10854	0	0	0	0	0	0	0	0
YBR004C	GPI18	0	0	0	0	0	0	0	0.95047	0	0	0	1.28387	0
YBR011C	IPP1	0	0	-1.98102	0	0	0	0	0	0	0	0	0	0
YBR012C		0	2.24343	0	0	0	0	0	0	0	0	0	0	0
YBR018C	GAL7	0	0	0	0	0	0	2.59434	0	0	0	0	0	0
YBR021W	FUR4	0	0	0	-1.33221	0	0	0	0	0	0	0	0	0
YBR028C		0	0	0	0	0	0	0	0	0	0	0	-1.06461	0
YBR029C	CDS1	0	-1.38023	-1.49708	0	-3.52323	-2.31832	-2.8206	0	0	0	0	0	-3.19054
YBR030W	RKM3	0	0	0	0	-2.30256	0	0	0	0	0	0	0	0
YBR032W		0	0	0	0	0	0	0	0	0	0	-2.06863	0	0
YBR033W	EDS1	0	1.25457	0	0	0	0	0	0	0	1.04312	0	0	0
YBR037C	SCO1	0	0	-1.45325	0	0	0	0	0	0	0	0	-1.1317	0
YBR038W	CHS2	0	0	0	0	0	-2.71419	0	0	0	0	0	0	0
YBR040W	FIG1	0	-1.99297	0	0	0	-3.08064	-3.34112	0	0	0	0	-2.63597	0
YBR043C	QDR3	0	1.50497	0	0	0	0	0	0	1.26971	1.22131	1.9251	0	0
YBR045C	GIP1	0	0	1.43694	1.52513	0	1.68929	0	0	0	0	1.37337	0	0
YBR046C	ZTA1	0	1.6209	1.4028	1.90643	0	1.87091	2.18736	0	0	0	2.29335	1.86647	0
YBR047W	FMP23	0	1.8488	3.03237	3.43308	0	0	0	0	0	1.57639	3.68145	2.17023	0
YBR048W	RPS11B	0	-1.45925	0	-2.22883	-2.53522	0	-2.86157	0	0	0	-1.7437	-1.43037	-2.77566
YBR050C	REG2	0	3.14419	1.73188	1.29071	0	2.85906	0	1.7712	-1.50146	2.87969	1.88166	0	0
YBR052C	RFS1	0	0	0	0	0	0	0	0	-1.11031	0	0	-1.36078	0
YBR054W	YRO2	0	0	0	-1.6419	0	0	0	0	0	0	0	0	3.21708
YBR056C-B		0	0	2.54025	0	0	0	0	0	0	0	0	2.71368	0
YBR056W-A		0	0	2.38221	0	0	0	0	0	0	0	0	2.54189	0
YBR066C	NRG2	0	0	-1.73849	-1.54932	-2.99149	-3.17386	-2.38962	-2.05655	0	-1.97209	0	0	-2.86513
YBR067C	TIP1	-0.437018	0	0	0	0	0	0	-1.96656	0	0	0	0	0
YBR068C	BAP2	0	0	0	0	0	0	0	-1.8315	-1.05329	0	0	0	0
YBR069C	TAT1	0	1.52797	0	0	0	0	0	0	0	0	0	0	0
YBR072W	HSP26	0	-3.28087	-2.86133	-3.24665	0	0	0	-5.62257	-5.56468	-2.40741	0	-2.51104	3.29243
YBR078W	ECM33	0	0	0	0	-2.59156	-2.91862	0	0	0	0	0	0	0
YBR082C	UBC4	0	-1.33028	0	0	0	0	0	0	0	0	0	0	0
YBR083W	TEC1	0	0	0	0	0	0	-1.81711	0	-1.20906	0	0	0	0
YBR084W	MIS1	0	0	0	0	-2.23236	-2.15757	-3.04227	0	0	0	0	0	-2.20023
YBR085C-A		0	0	0	0	0	0	0	0	0	-1.84129	0	0	0
YBR085W	AAC3	0	2.44883	0	0	0	0	0	0	0	0	2.50523	0	0
YBR088C	POL30	0	0	0	-1.50286	0	-2.60515	0	0	0	0	0	0	0
YBR089C-A	NHP6B	0	0	0	-1.42369	0	0	0	0	0	0	0	0	0
YBR093C	PHO5	0	0	0	1.55266	0	0	0	0	0	0	0	0	0
YBR096W		0	0	0	0	-1.87657	-1.90422	0	0	0	0	0	0	-2.35419
YBR104W	YMC2	0	0	1.71147	1.33396	0	0	-2.3462	0	1.2344	0	2.04935	1.08955	0
YBR105C	VID24	0	0	0	0	0	0	0	1.68877	1.34283	0	1.84501	0	0
YBR106W	PHO88	0	0	0	0	0	0	0	0	0	0	0	0	-2.53996
YBR108W	AIM3	0	1.2	0	0	0	0	0	0	0	0	0	1.10401	0
YBR117C	TKL2	0	-2.27372	-3.39571	-3.31789	0	0	0	-4.01274	-3.48993	-4.70155	-2.10031	-2.04079	0
YBR120C	CBP6	0	0	0	-1.21805	0	0	0	0	0	0	0	0	0
YBR121C	GRS1	0	0	0	0	0	0	0	0	0	0	0	0	-2.4461
YBR126C	TPS1	0	0	0	0	0	0	0	-1.50642	-1.31671	-2.1762	0	0	0
YBR126W-A		0	0	0	-1.68899	0	0	0	-1.1324	0	-1.97377	0	0	0
YBR126W-B		0	0	0	0	0	0	0	0	0	-2.05008	0	0	0
YBR132C	AGP2	0	1.46305	0	0	0	0	0	0	0	0	0	0	0
YBR143C	SUP45	0	0	0	0	0	0	0	0	0	0	0	0	-2.37444
YBR145W	ADH5	0	-1.08471	0	0	0	0	-1.69808	0	0	0	1.386	0	0
YBR147W	RTC2	0	0	0	0	0	0	0	0	0	0	1.93225	0	0
YBR148W	YSW1	0	0	1.36882	0	0	0	0	0	0	0	0	0	0
YBR154C	RPB5	0	0	0	0	0	0	-1.74016	0	0	0	0	0	0
YBR157C	ICS2	0	0	-1.75282	-3.2658	-2.04352	-1.72122	0	-2.51548	-1.07455	0	0	-2.06304	-2.10955
YBR158W	AMN1	0	-2.14101	-2.18891	-3.20264	-3.43225	-3.44452	-3.13276	-2.34783	0	-1.77726	-1.89146	-2.11901	-2.55541
YBR161W	CSH1	0	0	0	0	0	0	0	0	0	-1.14258	0	0	0
YBR162C	TOS1	0	0	0	0	-2.83076	-3.73661	0	0	0	0	0	0	0
YBR162W-A	YSY6	0	0	0	0	-1.93702	-1.88672	0	0	0	0	0	0	0
YBR169C	SSE2	0	0	-1.65367	-1.72236	0	0	0	-1.8822	-1.72615	-1.57787	0	0	0
YBR177C	EHT1	0	0	0	0	-5.11097	-3.78658	-2.58882	0	0	0	0	0	-2.33654
YBR181C	RPS6B	0	0	0	-1.86867	0	0	0	0	0	0	0	0	-2.37998
YBR182C	SMP1	0	0	0	0	0	0	0	0	0	0	1.84524	1.19983	0
YBR183W	YPC1	0	0	0	0	0	0	0	-1.73556	-1.63103	0	0	-2.34462	0
YBR185C	MBA1	0	0	0	0	-1.95361	-1.77619	-1.72655	0	0	0	0	-1.08191	-1.91339
YBR189W	RPS9B	0	-1.79886	0	-2.58933	-2.62855	0	-3.05223	0	0	0	-1.98062	-1.76473	-2.90667
YBR191W	RPL21A	0	-1.92197	0	-2.26653	-2.45331	0	-2.9294	0	0	0	-1.8711	-1.75317	-2.75157
YBR196C	PGI1	0	0	-2.58558	0	0	0	0	0	0	0	0	0	0
YBR201C-A		0	3.16575	0	0	3.72222	3.06716	0	0	0	1.52767	3.06027	0	4.02877
YBR203W	COS111	0	1.41089	0	0	0	0	0	0	0	0	0	0	0
YBR209W		0	2.14053	0	0	2.9432	0	0	0	0	0	0	0	0
YBR213W	MET8	0	0	0	0	0	0	0	1.25639	1.2153	1.43819	0	0	0
YBR222C	PCS60	0	1.70671	2.11286	1.93399	0	0	0	0	0	1.34106	2.25934	1.95257	0
YBR230W-A		0	0	0	-2.1391	0	0	0	0	0	0	0	0	0
YBR238C		0	0	0	0	0	0	0	0	1.22792	0	0	0	0
YBR241C		0	0	0	0	0	0	0	0	0	0	0	0	2.55199
YBR248C	HIS7	0	0	0	0	0	0	-2.2291	0	0	0	0	0	0
YBR249C	ARO4	0	0	0	0	-2.27596	0	-2.4085	0	0	0	0	0	-2.10868
YBR252W	DUT1	0	0	0	0	0	-2.04936	0	0	0	0	0	0	0
YBR255C-A		0	0	-1.39431	0	0	0	0	0	0	0	0	0	0
YBR256C	RIB5	0	0	0	1.68201	0	0	0	0	0	0	1.65989	1.39208	0
YBR268W	MRPL37	0	0	-1.64813	0	0	0	0	0	0	0	0	0	0
YBR280C	SAF1	0	0	0	0	0	0	2.6809	0	0	0	0	0	2.19703
YBR285W		0	0	-1.40983	-1.7359	0	0	0	-1.15033	-1.39999	-2.4609	0	0	0
YBR287W		0	0	0	0	0	0	0	0	0	-1.17472	0	0	0
YBR291C	CTP1	0	-1.69162	-2.44912	-1.89626	-2.63062	-2.65414	-2.79851	0	0	0	-2.07251	-1.58665	-2.29017
YBR294W	SUL1	0	0	-4.14784	-2.6995	0	0	-2.88627	0	0	0	-2.30612	0	0
YBR296C	PHO89	0	0	1.55191	3.43964	0	0	0	0	1.74052	2.30079	0	1.6034	0
YCL009C	ILV6	0	0	0	0	0	0	0	0	1.19293	0	0	0	0
YCL018W	LEU2	0	0	0	0	-3.20507	-5.37586	-5.33526	-2.16656	-1.58507	-1.98281	-2.10734	0	-3.92032
YCL019W		0	0	0	0	0	0	0	-1.95433	-1.39128	-2.63125	-1.78635	0	0
YCL025C	AGP1	0	0	0	0	0	0	0	1.263	1.6132	0	1.96947	0	0
YCL026C-A	FRM2	0	0	0	0	0	0	-3.26541	0	0	0	0	0	0
YCL026C-B	HBN1	0	1.59339	0	0	0	0	0	0	0	0	0	0	0
YCL030C	HIS4	0	0	0	0	0	0	-2.95204	0	0	0	0	0	0
YCL036W	GFD2	0	0	0	-1.41998	-2.33382	-2.95352	-2.97628	0	0	0	0	-1.65918	0
YCL037C	SRO9	0	-1.69896	0	0	-2.60526	-2.68528	-3.19263	0	0	0	0	0	0
YCL048W	SPS22	0	0	-2.15069	0	0	0	0	0	0	0	0	0	0
YCL048W-A		-0.530435	-2.56419	-4.36489	-4.64465	0	0	0	-4.23101	-2.95034	-4.30624	-2.36668	-3.12021	0
YCL054W	SPB1	0	0	0	0	0	0	0	0	1.03553	0	0	0	0
YCL057C-A		-0.345876	0	0	0	-1.86426	0	-1.81714	0	0	0	0	0	0
YCL064C	CHA1	0	0	0	0	0	0	0	0	0	0	0	3.28419	0
YCL067C	HMLALPHA2	0.844906	0	0	1.63123	1.81537	0	0	0	0	0	0	1.24463	0
YCL074W		0	0	0	10.5594	0	0	0	0	0	0	0	0	0
YCR002C	CDC10	0	0	0	0	-1.94068	0	0	0	0	0	0	0	0
YCR003W	MRPL32	0	0	0	0	-2.29754	0	-1.83066	0	0	0	0	0	-2.43747
YCR006C		0	0	0	0	0	0	0	0	0	0	0	0	2.19798
YCR010C	ADY2	0	4.07993	1.8271	0	4.14259	2.98591	4.4635	0	0	2.20496	0	2.04005	3.31514
YCR018C	SRD1	0	0	0	0	0	0	0	0	-3.02879	0	0	0	0
YCR018C-A		0.55672	0	0	0	0	0	0	0	0	0	0	0	0
YCR021C	HSP30	0	0	0	0	4.82106	6.10488	3.32699	-1.20522	-1.45065	0	-1.53838	1.13628	7.8359
YCR024C-B		0.454151	1.32126	0	0	0	0	0	0	0	0	0	0	0
YCR031C	RPS14A	0	-1.74637	0	-1.94905	0	0	-2.34353	0	0	0	-1.81083	-1.63264	-2.39227
YCR034W	FEN1	0	0	0	-1.49725	-3.03741	-2.9693	-2.76157	0	0	0	0	-1.24776	-3.57499
YCR043C		0	0	0	0	-2.54713	-1.955	-2.02945	0	0	0	0	0	-2.59304
YCR044C	PER1	0	0	0	0	-1.82538	0	0	0	0	0	0	0	0
YCR046C	IMG1	-0.403397	0	-1.58257	0	0	0	0	0	0	0	0	0	0
YCR047C	BUD23	0	0	0	0	0	0	0	0	0	1.10687	0	0	0
YCR048W	ARE1	0	0	0	0	0	0	0	0	1.24389	0	0	0	0
YCR059C	YIH1	-0.525537	0	0	0	0	0	0	0	0	0	0	0	0
YCR065W	HCM1	0	0	0	0	0	-2.14295	0	0	0	0	0	0	0
YCR071C	IMG2	0	0	-1.38482	0	0	0	0	0	0	0	0	0	0
YCR096C	HMRA2	0.63423	0	0	1.24157	0	0	0	0	0	0	0	0	0
YCR098C	GIT1	0	0	0	0	0	0	0	-1.27343	-1.35063	0	-1.74286	-1.63965	0
YCR101C		0	0	0	0	2.04125	0	0	0	0	0	0	0	2.26429
YCR102C		0	1.26797	0	0	1.8504	2.13191	0	0	0	0	0	0	0
YCR102W-A		0	2.25615	0	0	0	0	0	0	0	0	2.14808	0	0
YCR104W	PAU3	0	2.70958	0	0	2.73225	0	5.13549	0	0	0	0	0	0
YCR106W	RDS1	0	0	0	1.10351	0	0	0	0	0	0	0	0	0
YDL003W	MCD1	0	0	0	-1.47895	-2.87368	-3.71573	0	0	0	0	0	0	0
YDL012C		-0.435998	0	0	0	0	0	0	0	0	0	0	0	0
YDL014W	NOP1	0	0	0	0	0	0	-2.27781	0	1.25611	0	0	0	-2.18046
YDL021W	GPM2	0	0	-2.00972	0	0	0	0	-1.68845	-1.08142	-2.02831	0	0	0
YDL022W	GPD1	0	0	0	0	0	0	0	0	0	-2.15159	0	0	0
YDL024C	DIA3	0	0	0	0	0	0	3.08145	0	-1.15728	-1.37632	0	0	1.82567
YDL037C	BSC1	0	0	0	0	0	0	0	0	0	1.7645	2.50266	1.90474	0
YDL039C	PRM7	0	0	0	0	0	0	0	1.44605	0	2.06798	3.19595	2.48105	0
YDL048C	STP4	0	0	0	0	0	2.26106	0	0	0	0	1.67356	0	2.05198
YDL049C	KNH1	0	0	-2.96141	-1.57641	0	0	0	0	0	0	-2.56718	0	0
YDL052C	SLC1	0	-1.16773	0	0	-1.756	0	0	0	0	0	0	0	0
YDL054C	MCH1	0	0	0	0	0	0	0	0	0	0	1.83417	0	0
YDL055C	PSA1	0	-2.25086	-2.4132	-2.27246	-3.46295	-3.29361	-3.07751	0	0	0	0	0	0
YDL059C	RAD59	0	0	-2.18535	-1.28526	0	0	0	0	0	0	0	0	0
YDL061C	RPS29B	0	-1.39855	0	-1.66813	0	0	-1.98953	0	0	0	-1.67599	-1.13399	-1.85049
YDL075W	RPL31A	0	-1.56064	0	-1.86953	0	0	-2.4782	0	0	0	-1.69624	-1.42229	-2.30865
YDL076C	RXT3	0	0	0	0	0	0	0	0	0	-1.04106	0	0	0
YDL079C	MRK1	0	0	0	0	0	0	0	0	0	-1.30969	0	0	0
YDL081C	RPP1A	0	0	0	-1.89423	0	0	-2.23874	0	0	0	0	0	-2.35887
YDL082W	RPL13A	0	-1.78907	0	-1.96839	-2.26892	0	-2.79226	0	0	0	-1.72231	-1.29715	-2.49457
YDL083C	RPS16B	0	-1.6305	0	-2.20415	0	0	-2.92192	0	0	0	-1.8365	-1.84013	-2.34755
YDL085C-A		0	0	0	0	0	-2.0105	-2.12541	0	0	0	0	0	0
YDL085W	NDE2	0	2.37035	0	0	0	0	0	0	-1.71965	0	2.39851	0	0
YDL101C	DUN1	0	0	0	0	0	-2.23265	0	0	0	0	0	0	0
YDL110C	TMA17	0	0	0	0	0	0	0	0	0	-1.22556	0	0	0
YDL114W		-1.41294	0	0	0	0	0	0	0	-2.55839	0	0	0	0
YDL124W		0	0	-2.53817	0	0	0	0	-1.55261	-1.26119	-2.14965	0	0	0
YDL130W	RPP1B	0	-1.57636	0	-2.04607	-2.48148	-1.89273	-2.74066	0	0	0	-1.70037	-1.44342	-2.26435
YDL131W	LYS21	0	0	0	0	0	0	-2.52607	0	0	0	0	0	-2.34239
YDL133C-A	RPL41B	0	0	0	-1.10287	0	0	0	0	0	0	0	0	0
YDL136W	RPL35B	0	-1.46795	0	-1.79731	0	0	0	0	0	0	-1.5487	0	-2.21282
YDL169C	UGX2	0	0	0	0	2.15635	2.31025	0	0	0	0	0	0	0
YDL170W	UGA3	0	0	1.65007	2.24134	0	0	0	0	0	0	2.26403	1.08846	0
YDL178W	DLD2	0	0	0	0	0	0	-1.80792	0	0	0	0	0	0
YDL179W	PCL9	0	-1.05387	0	-1.27164	0	-2.57431	0	-0.960113	0	-1.5183	0	-1.45944	0
YDL181W	INH1	0	0	0	-1.22047	0	0	0	0	0	0	0	0	0
YDL182W	LYS20	0	0	0	0	-2.26129	-2.15134	-2.88163	0	0	0	0	0	0
YDL186W		0	0	0	0	2.35184	0	0	0	0	0	0	0	0
YDL191W	RPL35A	0	-1.48596	0	-1.90653	0	0	0	0	0	0	0	0	-2.25573
YDL192W	ARF1	0	0	0	0	-2.10821	0	0	0	0	0	0	0	-2.12209
YDL198C	GGC1	0	0	0	0	-3.59254	-3.21933	-3.76774	0	0	0	0	0	-2.96924
YDL199C		0	0	0	0	0	0	0	0	-0.963175	0	0	0	0
YDL202W	MRPL11	0	0	0	0	0	0	0	0	0	0	0	0	-1.76419
YDL204W	RTN2	0	-1.65248	-2.24862	-2.51673	0	0	0	-2.6257	-2.58813	-2.9454	0	0	0
YDL210W	UGA4	0	0	0	0	0	0	0	0	0	0	2.61383	0	0
YDL214C	PRR2	0	1.6135	0	1.46543	2.72384	2.70104	2.48115	0	0	0	2.08014	0	2.82791
YDL218W		-0.330843	-2.16293	-2.31877	-2.77278	0	0	0	-2.66657	-2.62416	-2.71899	-1.69651	-1.93042	2.18223
YDL219W	DTD1	0	0	0	0	-1.97744	-2.55956	0	0	0	0	0	0	0
YDL222C	FMP45	-0.39972	0	-2.00165	-2.22799	0	0	0	-3.1906	-2.46457	-2.87653	0	0	2.71475
YDL223C	HBT1	0	0	-2.013	-1.61522	0	0	0	-2.09368	-1.67799	-1.99357	0	0	0
YDL227C	HO	0	-1.16109	0	-4.07252	-3.87382	-5.23781	-5.59291	0	0	0	0	-1.55747	-2.34398
YDL229W	SSB1	0	0	0	0	0	0	-3.29354	0	0	0	0	0	0
YDL234C	GYP7	0	0	0	0	0	0	0	0	0	0	0	1.47827	0
YDL236W	PHO13	0	0	0	0	-2.29019	-2.20643	-1.95856	0	0	0	0	0	-2.41316
YDL241W		0	0	0	0	0	0	0	0	2.85548	0	0	0	0
YDL243C	AAD4	0	1.55905	0	1.21135	0	0	0	0	0	0	1.67656	0	0
YDR009W	GAL3	0	0	0	0	0	0	0	1.00113	0	1.00816	0	0	0
YDR019C	GCV1	0	0	0	-2.50351	0	0	0	-1.28967	0	0	-2.09798	0	0
YDR025W	RPS11A	0	0	0	-1.81604	0	0	0	0	0	0	0	0	0
YDR033W	MRH1	0	0	0	0	0	-2.63385	0	0	0	0	0	0	0
YDR034C-D		0	0	0	0	0	0	0	-1.67414	-1.17559	-2.19823	0	0	0
YDR034W-B		0	0	0	0	0	0	2.42185	-1.42884	0	0	0	1.8086	3.11359
YDR035W	ARO3	0	0	0	0	0	0	0	0	1.14952	0	1.85325	0	0
YDR037W	KRS1	0	0	0	0	0	-2.50676	-3.0352	0	0	0	0	0	0
YDR040C	ENA1	0	0	0	0	0	0	2.59536	0	0	0	0	0	0
YDR043C	NRG1	0	0	0	0	0	0	3.42944	0	1.27157	0	0	0	0
YDR044W	HEM13	0	1.26568	0	0	0	0	0	0	0	0	0	0	0
YDR046C	BAP3	0	1.38718	0	0	2.03559	0	0	0	0	0	0	0	0
YDR047W	HEM12	0	0	0	0	0	-1.86452	0	0	0	0	0	-1.10158	-2.1476
YDR050C	TPI1	0	-2.73263	-4.11475	-2.45896	0	0	0	-2.13711	0	-2.99342	0	0	0
YDR055W	PST1	0	0	0	0	-2.52678	-3.73856	0	0	0	0	0	0	0
YDR063W	AIM7	0	0	0	0	0	0	0	-0.910557	0	-1.00617	0	0	0
YDR064W	RPS13	0	0	0	-2.03873	-2.41044	0	-2.71645	0	0	0	0	0	-2.69482
YDR070C	FMP16	0	-1.56641	-2.86391	-1.6349	2.04263	0	3.27779	-3.08824	-1.80032	-2.90216	-2.12605	0	3.00447
YDR074W	TPS2	0	0	0	0	0	0	0	0	0	-1.68138	0	0	0
YDR091C	RLI1	0	0	0	0	0	0	0	0	0	0	0	0	-2.08815
YDR100W	TVP15	0	0	0	0	0	0	0	-0.92136	0	0	0	-1.04996	0
YDR116C	MRPL1	0	0	-1.48934	0	0	0	0	0	0	0	0	0	-1.77608
YDR119W	VBA4	0	-1.22244	0	-1.4054	0	-1.87048	0	0	0	0	-1.47303	-1.26109	-2.31165
YDR119W-A		0	0	0	0	3.67948	3.12492	4.47635	0	-1.23446	0	0	1.37779	4.29622
YDR134C		0	0	0	0	0	-3.31316	0	-1.77264	0	0	0	0	0
YDR144C	MKC7	0	0	0	-1.2115	-2.95789	-2.79376	-2.23014	0	0	0	0	0	-2.7267
YDR146C	SWI5	0	0	0	0	-1.87546	-3.5537	0	0	0	0	0	0	0
YDR158W	HOM2	0	0	0	0	-2.43554	-2.43608	-3.0712	0	0	0	0	0	0
YDR169C-A		0	0	0	2.24346	0	0	0	0	0	0	2.1498	0	0
YDR170W-A		0	0	0	0	1.91041	0	0	0	0	0	0	0	0
YDR171W	HSP42	0	0	0	0	0	0	0	-1.66805	-1.83157	0	0	0	0
YDR179C	CSN9	0	0	0	0	0	1.84821	1.89417	0	0	0	0	0	0
YDR210W-B		0	0	0	0	0	0	0	-1.47437	0	-2.09141	0	0	0
YDR215C		0	0	2.1589	0	0	0	0	0	0	0	0	0	0
YDR218C	SPR28	0	0	0	0	0	0	-2.53743	0	0	0	0	0	0
YDR223W	CRF1	0	1.10516	0	0	2.14154	2.27179	1.74523	0	0	0	0	1.20464	2.04866
YDR226W	ADK1	0	0	0	0	0	-2.41549	0	0	0	0	0	0	0
YDR234W	LYS4	0	0	0	0	-3.57666	-3.04108	-4.35933	0	0	0	0	0	-3.09905
YDR237W	MRPL7	0	0	-1.31552	0	0	0	-1.75037	0	0	0	0	-1.18644	-1.99
YDR248C		0	-1.22736	-2.03983	0	0	0	0	0	0	-1.54897	-1.66376	0	0
YDR253C	MET32	0	0	-1.44474	0	0	0	0	0	0	0	-1.28698	0	0
YDR256C	CTA1	0	2.90146	0	0	3.88013	3.80416	4.45032	0	0	2.63942	0	2.69439	3.46967
YDR257C	RKM4	0	0	0	0	-2.09509	-1.9167	-2.37021	0	0	0	0	0	-1.96423
YDR259C	YAP6	0	0	0	0	0	0	0	0	0	0	2.22473	0	0
YDR261C	EXG2	0	0	0	0	-2.10408	-1.92231	-2.41625	0	0	0	0	0	-1.83374
YDR261W-B		0	0	0	0	0	0	0	-1.46581	-1.08919	-2.0543	0	0	0
YDR268W	MSW1	0	0	0	0	0	-2.34154	-1.90052	0	0	0	0	0	0
YDR274C		0	0	0	0	0	0	1.8824	0	0	0	-1.55743	0	0
YDR275W	BSC2	0	0	0	0	0	0	0	0	-1.16534	0	-1.25405	0	0
YDR277C	MTH1	0	0	0	0	2.22222	2.34485	0	1.19739	0	0	0	0	2.10776
YDR281C	PHM6	0	0	0	0	0	0	-2.83396	0	0	0	0	0	0
YDR300C	PRO1	0	0	0	0	-1.89802	0	0	0	0	0	0	0	-1.91291
YDR309C	GIC2	0	1.59732	2.45997	0	-2.24775	-2.55348	-2.17044	0	0	0	1.49832	0	0
YDR321W	ASP1	0	0	0	0	0	0	0	0	0	0	0	0	-1.87652
YDR322W	MRPL35	0	0	-1.31393	0	0	0	-1.67786	0	0	0	0	-1.18247	0
YDR337W	MRPS28	0	0	-1.32837	0	0	0	0	0	0	0	0	0	-1.77819
YDR342C	HXT7	0	0	0	0	0	2.6763	0	0	0	0	0	0	0
YDR343C	HXT6	0	0	0	0	0	2.75379	0	0	0	2.11298	0	0	0
YDR344C		0	0	0	0	0	0	0	0	1.7736	0	0	0	0
YDR345C	HXT3	0	6.74934	0	0	4.98166	2.60441	0	1.05778	4.45152	3.34264	2.29734	0	0
YDR347W	MRP1	0	0	-1.48672	0	0	0	-1.71297	0	0	0	0	0	0
YDR353W	TRR1	0	0	0	0	-2.21733	-1.87666	-2.09753	0	0	0	0	0	-2.1056
YDR365C	ESF1	0	0	0	0	0	0	0	0	1.00787	0	0	0	0
YDR366C		0.416502	0	0	1.21355	0	0	0	0	0	0	0	0	0
YDR368W	YPR1	0	0	0	0	0	0	0	0	0	-1.25842	0	0	0
YDR371W	CTS2	0	-1.62815	0	0	0	0	0	0	0	-1.09332	-1.53587	0	0
YDR374C		0	0	0	0	0	0	3.03602	0	0	0	0	1.75128	0
YDR375C	BCS1	0	0	0	0	0	0	0	0	0	0	0	0	-2.2882
YDR380W	ARO10	0	0	-1.53178	0	0	0	0	0	0	0	0	0	0
YDR382W	RPP2B	0	-1.74766	0	-2.00576	0	0	-2.81144	0	0	0	-1.68075	0	-2.69189
YDR384C	ATO3	-0.368528	0	0	0	0	0	0	0	0	0	0	1.90657	0
YDR391C		0	0	0	0	0	0	0	0	0	-1.06026	0	0	0
YDR400W	URH1	0	-1.35324	0	0	-1.92932	-2.16831	-2.10108	0	0	0	0	0	0
YDR425W	SNX41	0	0	0	0	0	0	0	0	0	0	0	1.22215	0
YDR447C	RPS17B	0	0	0	-2.1657	0	0	-2.03552	0	0	0	0	0	-2.10173
YDR449C	UTP6	0	0	1.65607	0	0	0	0	0	1.12435	0	0	0	0
YDR450W	RPS18A	0	0	0	-2.10399	0	0	0	0	0	0	-1.88752	-1.57437	-2.72773
YDR451C	YHP1	0	-1.11523	0	0	0	-2.33107	0	0	0	-1.28523	0	0	0
YDR453C	TSA2	0	0	0	0	0	0	0	0	0	0	1.36268	0	0
YDR461W	MFA1	0	-2.76679	-3.13907	-2.23245	0	0	-1.92788	-3.00315	-3.54445	-2.40446	-2.76076	-2.23102	0
YDR471W	RPL27B	0	-1.29034	0	-1.69204	0	0	-2.03073	0	0	0	-1.46745	-1.26002	-1.94406
YDR497C	ITR1	0	-2.63885	-2.46449	0	-3.2448	0	-2.89588	0	0	0	0	0	0
YDR500C	RPL37B	0	-1.53345	0	-1.8028	-1.9924	0	-2.14707	0	0	0	-1.62016	-1.44609	-2.2797
YDR502C	SAM2	0	-2.32487	-4.55235	0	-5.25034	-3.45751	-5.5908	0	0	0	-2.504	-2.10896	-3.93665
YDR507C	GIN4	0	0	0	0	0	-2.33155	0	0	0	0	0	0	0
YDR508C	GNP1	0	1.23962	1.47121	0	1.9299	2.73824	4.01195	1.85522	1.89675	0	1.48939	1.6697	1.96337
YDR511W	ACN9	0	0	-1.70412	0	0	0	0	0	0	0	0	0	0
YDR516C	EMI2	0	0	-1.72353	0	0	0	0	0	0	-1.46042	0	0	0
YDR517W	GRH1	0	0	-1.31312	0	0	0	0	0	0	0	0	0	0
YDR518W	EUG1	0	0	0	0	0	0	0	0	0	-1.04873	0	0	0
YDR523C	SPS1	0	0	0	0	0	0	-2.76199	0	-1.40451	0	-1.80331	0	0
YDR524C-B		-0.550391	0	0	0	-3.14963	-3.2702	-3.26871	0	0	0	0	0	0
YDR524W-C		0	0	0	-1.95035	-2.2291	-2.14485	-2.45172	0	0	0	0	0	0
YDR528W	HLR1	0	0	0	-1.54595	0	0	0	-1.14284	0	0	-1.56613	0	0
YDR533C	HSP31	0	0	0	0	0	0	0	-1.27926	0	-2.23166	0	-1.19076	0
YDR534C	FIT1	0	0	0	0	1.91334	0	2.48869	0	0	0	0	0	0
YDR535C		0	0	0	0	2.69976	0	3.2923	0	0	0	0	0	0
YDR536W	STL1	0	2.6286	0	1.44846	1.92163	1.84043	2.96034	1.03028	1.02103	1.21037	0	1.04672	0
YDR540C	IRC4	0	1.27351	0	0	0	0	0	0	0	0	1.34713	0	0
YEL001C	IRC22	0	0	0	0	0	-1.83097	0	0	0	0	0	0	0
YEL008W		0	0	0	0	2.5887	0	0	0	0	0	0	0	3.32564
YEL011W	GLC3	0	0	0	0	0	0	0	0	-1.52016	-1.64773	0	0	0
YEL020C		0	1.18494	1.44457	0	0	0	0	0	0	0	1.54734	0	0
YEL026W	SNU13	0	-1.56303	0	-1.18083	0	0	0	0	0	0	-1.49251	0	0
YEL030W	ECM10	0	0	0	0	0	0	0	0	0	0	0	0	2.16241
YEL035C	UTR5	0	0	0	0	0	0	0	0	0	0	0	0	2.6713
YEL039C	CYC7	0	0	0	0	0	0	0	0	0	-2.98308	0	0	0
YEL040W	UTR2	0	-2.55987	0	-2.19743	-5.64821	-3.99438	-5.07841	-1.10041	0	0	0	0	-3.49299
YEL041W	YEF1	0	-1.24944	-2.00272	0	0	0	0	-1.1209	-0.986296	-1.65922	-1.26657	0	0
YEL045C		0	0	0	2.62846	0	0	0	0	0	0	0	0	0
YEL050C	RML2	0	0	-1.42607	0	0	0	0	0	0	0	0	0	0
YEL054C	RPL12A	0	0	0	-2.29376	0	0	0	0	0	0	0	0	0
YEL058W	PCM1	0	0	0	0	-1.91956	0	0	0	0	0	0	0	0
YEL065W	SIT1	0	2.33494	0	0	0	2.09504	0	0	0	1.64384	0	0	3.23975
YEL070W	DSF1	0	0	0	0	0	0	3.21654	1.40263	0	0	0	0	0
YEL073C		0	-2.28967	-1.88037	0	-2.08513	0	-2.17068	0	0	-1.58239	0	-1.44502	0
YER001W	MNN1	0	0	0	0	-2.29282	0	-1.97862	0	1.33119	0	0	0	-2.08521
YER003C	PMI40	0	0	-1.839	0	-2.47721	-2.32599	0	0	0	0	0	0	-2.10494
YER011W	TIR1	0	2.03146	0	0	2.4645	0	0	0	0	0	0	0	0
YER015W	FAA2	0	2.06368	0	0	0	0	2.92453	0	0	0	0	2.20699	0
YER018C	SPC25	0	0	0	0	0	0	0	0.947379	0	1.16148	0	0	0
YER026C	CHO1	0	0	-2.32653	0	-3.04375	-2.53131	-2.32009	0	0	0	0	-1.49223	-2.72749
YER028C	MIG3	0	2.25895	0	0	2.17507	2.03278	0	0	0	0	0	0	0
YER033C	ZRG8	0	0	0	0	0	0	0	0	0	0	1.68061	0	0
YER035W	EDC2	-0.401388	0	0	0	0	0	0	0	-0.907386	0	0	0	0
YER037W	PHM8	0	0	0	0	0	0	0	1.73803	0	0	0	0	0
YER038C	KRE29	0	0	0	0	0	0	0	1.01221	0	0	0	0	0
YER042W	MXR1	0	0	-1.67624	0	0	0	0	0	0	0	0	0	0
YER043C	SAH1	0	0	-2.17895	0	-5.30618	-3.88787	-5.22317	0	0	0	0	0	-4.29178
YER044C	ERG28	0	0	0	-1.49931	0	0	0	0	0	0	0	0	0
YER045C	ACA1	0	0	0	0	0	2.01378	0	0	0	0	0	0	2.04351
YER052C	HOM3	0	0	0	0	0	0	-3.39181	0	0	0	0	0	0
YER053C	PIC2	0	-1.18899	0	0	-1.99334	0	-2.30142	-1.11317	-1.28942	-1.56735	0	-1.92003	0
YER053C-A		0.739754	0	0	0	0	1.75606	0	0	-1.18071	0	0	0	1.88741
YER054C	GIP2	0	-1.32838	-2.24133	-2.65184	0	0	0	-1.55883	-2.75703	-3.13022	-2.20722	0	0
YER056C	FCY2	0	0	0	0	-2.72008	-2.31966	-3.78297	0	0	0	0	-1.70781	-2.4892
YER056C-A	RPL34A	0	-1.72856	0	-2.14332	-2.0784	0	-2.69439	0	0	0	-1.86992	-1.46727	-2.15151
YER060W-A	FCY22	0	0	0	0	0	0	0	0.973934	0	1.34907	0	0	0
YER061C	CEM1	0	0	0	0	0	0	0	0	0	1.21231	0	0	0
YER062C	HOR2	0	-1.35932	-1.91498	-1.55097	0	0	0	-1.05388	0	-1.24218	-1.53376	-1.21527	0
YER065C	ICL1	0	3.4932	3.79104	3.86771	0	0	0	0	0	3.77835	3.75126	0	0
YER067C-A		0	0	0	0	0	0	0	-2.09419	-2.24523	0	0	0	0
YER067W	RGI1	0	0	0	0	-3.04111	0	0	-1.70472	-2.10428	-1.59056	0	0	0
YER070W	RNR1	0	0	0	-2.13671	-3.5983	-3.83511	0	0	0	0	0	0	0
YER073W	ALD5	0	-1.35096	0	0	-3.39111	-2.73758	-2.57015	0	1.3415	0	0	0	0
YER074W	RPS24A	0	-1.49505	0	-1.89702	0	0	-2.35262	0	0	0	-1.74888	0	-2.36117
YER078C	ICP55	0	0	0	0	0	0	0	0	0	0	0	-1.16726	0
YER079W		0	0	0	0	0	0	0	-0.949943	-0.981668	0	0	0	0
YER081W	SER3	0	0	0	0	-2.31659	-2.20127	-2.38355	0	0	0	0	0	0
YER084W		0	0	0	0	4.43053	3.20407	3.14632	0	0	0	0	0	4.79471
YER087C-B	SBH1	0	0	0	-1.10569	0	0	0	0	0	0	0	0	0
YER091C	MET6	0	0	-2.71358	0	0	0	-3.89097	0	0	0	0	0	0
YER093C-A	AIM11	0	0	-1.77373	-1.35882	0	0	0	0	0	0	0	0	0
YER096W	SHC1	0	0	-1.29098	0	0	0	2.73664	-2.14931	0	-1.00192	0	0	0
YER102W	RPS8B	0	0	0	-1.8612	0	0	0	0	0	0	0	0	0
YER103W	SSA4	0	-1.55463	0	-1.56387	0	0	0	-1.70878	-1.97562	-1.55987	0	0	0
YER117W	RPL23B	0	0	0	-1.74424	0	0	-2.21856	0	0	0	0	0	-2.1417
YER121W		0	0	0	0	2.58747	2.56742	2.87956	0	0	0	0	1.53956	1.80838
YER124C	DSE1	0	-4.93006	-4.6557	-3.92961	-4.10649	-4.75025	-3.77421	-4.83234	0	-4.78337	-2.98402	-4.46447	0
YER131W	RPS26B	0	-2.43841	0	-2.92541	-3.23089	-2.98191	-4.08094	0	0	0	-2.12804	-2.16205	-3.38952
YER135C		0	0	0	0	0	0	2.38085	0	0	0	0	0	3.29341
YER138W-A		0.80289	0	0	0	0	0	0	0	0	0	0	0	0
YER150W	SPI1	0	-1.81942	-1.58348	-2.26202	2.62902	3.12383	2.23261	-1.53779	-2.60224	-1.5536	-1.35371	0	2.90667
YER156C		0	0	0	0	-2.17095	0	-1.93576	0	0	0	0	0	-2.59685
YER158C		0	0	0	0	0	0	0	0	0	0	1.97716	0	0
YER163C		0	0	0	0	-2.15056	-2.01655	-2.20268	0	0	0	0	0	0
YER175C	TMT1	0	0	1.39847	2.62797	0	0	0	0	0	0	2.96171	0	0
YER175W-A		0	0	2.89674	2.1877	0	0	0	0	0	0	2.49003	0	0
YER179W	DMC1	0	0	0	0	0	0	2.88129	0	0	0	0	0	0
YER182W	FMP10	0	0	-1.33408	0	0	0	0	0	0	0	0	0	0
YER184C		0	0	0	0	0	0	0	0	0	0	1.33222	1.18489	0
YER188W		0	0	0	0	0	0	0	0	-1.45033	0	0	-1.63296	0
YFL002W-A		0	0	0	0	0	0	0	-1.74496	-1.19788	-2.48272	0	0	0
YFL003C	MSH4	0	0	0	0	2.10112	0	0	0	0	0	0	0	0
YFL004W	VTC2	0	0	0	0	0	0	0	0	0	-1.35464	0	0	0
YFL011W	HXT10	0	0	-1.86611	0	0	0	0	0	-1.75474	0	0	0	0
YFL012W		0	0	-2.48163	0	0	0	-2.45024	0	0	0	0	0	0
YFL014W	HSP12	0	0	-2.98135	0	0	0	0	0	-1.43728	-4.36045	0	0	0
YFL022C	FRS2	0	0	0	0	0	0	-2.11625	0	0	0	0	0	0
YFL024C	EPL1	0	0	0	0	0	0	0	0	0	0	0	1.03445	0
YFL026W	STE2	0	-3.08399	0	-2.32759	-2.84424	-2.43107	-3.01931	-2.15099	-2.03462	-1.82216	-1.79088	-1.78897	-2.52288
YFL028C	CAF16	0	0	0	0	0	0	0	0	0	0	1.23482	0	0
YFL030W	AGX1	0	2.10882	0	0	0	0	0	0	0	1.75185	0	0	0
YFL034C-A	RPL22B	0	-1.90456	0	-1.31792	0	0	0	0	0	0	0	0	0
YFL052W		0	0	0	0	0	1.76557	2.1329	1.30631	0	0	0	1.42366	2.15854
YFL053W	DAK2	0	0	0	0	0	2.04334	4.14798	3.18769	1.3392	0	0	0	0
YFL054C		0	1.92903	0	0	3.32195	3.24969	3.83598	1.77568	0	0	1.37179	0	2.91774
YFL055W	AGP3	0	0	0	0	0	2.29752	0	0	-1.41412	1.32651	0	0	2.13816
YFL058W	THI5	0	0	-1.81005	0	0	0	0	0	0	0	0	0	0
YFL061W	DDI2	0	0	0	0	0	0	0	0	0	0	0	1.16476	0
YFR005C	SAD1	0	-1.9645	0	-1.39722	-2.9685	-3.15579	-2.13325	-1.05197	-1.08858	0	-1.45616	-1.9267	-1.9398
YFR006W		0	-2.73404	-2.15789	-2.73423	-3.50193	-3.49745	-3.13571	-2.35788	-2.19564	0	-2.44191	-2.40906	-3.34843
YFR012W		0	0	0	0	0	0	-2.74663	0	0	0	0	0	0
YFR015C	GSY1	0	0	0	-1.81091	0	0	0	-1.83572	-1.59148	-2.44155	0	0	0
YFR017C		0	0	0	0	0	0	0	0	0	0	0	0	2.31859
YFR018C		0	1.87989	0	1.13111	0	0	0	0	1.06946	1.17533	0	1.55356	0
YFR023W	PES4	0	0	-1.92738	0	0	0	0	0	0	0	0	0	0
YFR025C	HIS2	0	0	0	0	0	0	-1.79934	0	0	0	0	0	0
YFR032C	RRT5	0	0	2.77122	0	0	0	0	0	0	0	0	0	3.04793
YFR032C-A	RPL29	0	-1.66139	0	-1.99564	0	0	-2.32527	0	0	0	-1.42796	-1.22214	-1.81621
YFR033C	QCR6	0	0	0	0	0	0	-2.25933	0	0	0	0	0	0
YFR044C	DUG1	0	0	-1.57206	0	-2.13716	-2.3802	0	-1.33826	-1.19642	0	0	0	0
YFR047C	BNA6	0	0	-1.49102	0	0	0	0	0	0	0	0	0	0
YFR057W		0	0	0	5.59112	0	0	0	0	0	0	0	0	0
YGL001C	ERG26	0	0	0	0	-3.38432	-3.13109	-2.80043	0	0	0	0	0	-3.072
YGL008C	PMA1	0	0	0	0	-3.40356	-3.55771	0	0	0	0	0	0	0
YGL009C	LEU1	0	0	-1.79918	0	0	0	0	0	0	0	0	0	0
YGL012W	ERG4	0	0	0	0	-3.45455	-3.53034	-3.34765	0	0	0	0	0	-2.94025
YGL021W	ALK1	0	0	0	0	0	-2.04754	0	0	0	0	0	0	0
YGL028C	SCW11	0	-3.31699	-3.34629	-3.18694	-3.41176	-3.28916	-3.01939	-3.82579	0	-3.86453	-2.82038	-3.35506	-1.97226
YGL030W	RPL30	0	-1.60999	0	-1.98663	0	0	0	0	0	0	0	0	0
YGL031C	RPL24A	0	0	0	-1.99928	0	0	-2.40834	0	0	0	-1.65901	-1.44329	-2.2808
YGL032C	AGA2	0	-1.25001	-1.31052	-2.30156	0	0	0	-1.81919	-1.7564	-1.56806	-1.72832	-1.53355	0
YGL033W	HOP2	0	0	-2.60212	0	0	0	2.43852	0	0	0	0	0	0
YGL037C	PNC1	0	0	-1.62918	0	0	0	0	-1.46889	-1.20891	-2.63962	0	0	0
YGL045W	RIM8	0	0	0	0	2.30326	1.99668	0	0	0	0	2.08005	0	2.00906
YGL047W	ALG13	0	0	0	0	0	0	0	-1.1922	0	0	0	0	0
YGL059W	PKP2	0	0	0	0	0	0	0	0	0	0	1.65304	0	0
YGL066W	SGF73	0	0	0	0	0	0	0	0	0	0	1.33451	0	0
YGL076C	RPL7A	0	0	0	0	0	0	-2.48584	0	0	0	0	0	0
YGL077C	HNM1	0	0	0	0	-2.61509	-2.50132	0	0	0	0	0	0	-3.04739
YGL078C	DBP3	0	0	0	0	0	0	-1.99103	0	0	0	0	0	0
YGL080W	FMP37	0	0	0	0	0	0	0	0	0	0	0	1.36229	0
YGL081W		0	0	0	0	0	0	1.8689	0	0	0	0	0	0
YGL096W	TOS8	0	0	0	0	0	1.84772	0	0	0	0	2.30339	0	2.34344
YGL097W	SRM1	0	0	0	0	-2.30077	-1.84575	-1.88075	0	0	0	0	0	0
YGL117W		0	0	0	0	0	-1.6747	0	0	0	0	0	0	0
YGL120C	PRP43	0	0	0	0	-1.81546	-1.76876	-2.28562	0	0	0	0	0	0
YGL121C	GPG1	0	0	-1.94956	0	0	0	0	0	-0.91995	0	0	0	2.36386
YGL125W	MET13	0	-1.49558	0	0	-2.36964	-2.55764	-2.62077	0	0	0	0	0	0
YGL127C	SOH1	-0.604348	0	0	0	0	0	0	0	0	0	0	0	0
YGL135W	RPL1B	0	0	0	-1.80815	0	0	0	0	0	0	0	0	0
YGL143C	MRF1	0	0	-1.60301	0	0	0	0	0	0	0	0	-1.04978	0
YGL146C	RRT6	0	1.21735	0	0	0	0	0	0	0	1.23021	0	0	0
YGL147C	RPL9A	0	-2.12126	0	-2.76884	-3.19545	-2.83723	-3.61696	0	0	0	-1.86286	-2.22925	-3.44141
YGL157W	ARI1	0	1.41181	0	0	0	0	0	0	1.54352	0	0	0	0
YGL158W	RCK1	0	0	0	0	2.52143	0	0	0	0	0	0	0	2.69222
YGL170C	SPO74	0	0	0	0	0	0	0	0	0	0	0	0	2.25856
YGL178W	MPT5	0	0	0	1.7731	0	0	0	0.918412	0	0	0	1.25319	0
YGL180W	ATG1	0	0	0	1.26499	0	0	0	0	0	0	1.54134	1.36225	0
YGL183C	MND1	0	0	0	0	0	0	0	0	0	0	0	1.9531	2.53603
YGL184C	STR3	0	0	0	0	0	0	0	-1.05641	0	0	0	0	0
YGL188C		0	1.5886	0	0	0	0	0	0	0	0	0	0	0
YGL189C	RPS26A	0	-1.63788	0	-1.78876	0	0	0	0	0	0	-1.73014	-1.44056	0
YGL202W	ARO8	0	0	0	0	-3.6264	-3.30389	-3.89876	0	0	0	0	0	-2.81934
YGL205W	POX1	0	1.6635	0	0	3.25373	2.64921	3.62639	0	0	1.51673	0	2.25736	2.58197
YGL208W	SIP2	0	1.50007	0	0	0	0	0	1.03889	0	0	1.37041	0	0
YGL209W	MIG2	0	1.29093	0	0	0	0	0	0	0	0	0	0	0
YGL222C	EDC1	0	0	0	-1.176	0	0	0	-1.15961	-1.13109	0	0	0	0
YGL225W	VRG4	0	-1.18538	0	-1.44333	-2.34809	-2.19537	0	0	0	-1.19308	0	0	-2.42046
YGL229C	SAP4	0	0	0	0	-2.32895	-2.24643	0	0	0	0	0	0	0
YGL236C	MTO1	0	0	0	0	0	0	-2.31773	0	0	0	0	0	0
YGL242C		0	0	-1.53322	0	-2.44955	-2.15821	0	0	0	0	-1.17518	0	-1.80323
YGL253W	HXK2	0	0	0	0	0	0	-2.3732	0	0	0	0	0	0
YGL255W	ZRT1	0	3.86162	0	0	3.42598	3.33629	6.44403	0	0	0	0	1.2699	3.07666
YGR008C	STF2	0	0	-1.55031	0	0	0	0	0	0	-1.60005	0	0	0
YGR020C	VMA7	0	0	0	-1.27672	-2.01623	-2.01462	-1.87564	0	0	0	0	-1.40111	0
YGR023W	MTL1	0	1.10296	0	0	0	0	0	0	0	0	0	0	0
YGR025W		0.821017	0	0	0	0	0	0	0	0	0	0	0	0
YGR027C	RPS25A	0.338793	0	0	0	0	0	0	0	0	0	0	0	0
YGR034W	RPL26B	0	-1.84202	0	-2.22918	-2.52647	-2.10714	-3.05163	0	0	0	-1.92387	-1.65548	-3.09555
YGR037C	ACB1	0	0	-1.89719	0	0	0	0	0	0	0	0	0	0
YGR043C	NQM1	0	0	-2.92409	-1.58614	0	0	0	-2.81897	-2.14609	-2.2726	0	0	0
YGR044C	RME1	0	0	-1.67688	-2.36662	-2.93424	-2.70631	0	-1.97469	-1.40232	-1.56824	-2.27964	-1.95399	0
YGR049W	SCM4	0	0	0	-1.19628	0	0	0	0	0	0	0	0	0
YGR051C		0	0	0	0	0	0	0	0	0	0	0	1.77794	0
YGR052W	FMP48	-0.370591	0	0	-2.55571	0	0	0	-2.33974	-1.03961	-2.23419	1.69768	0	0
YGR055W	MUP1	0	0	-2.85542	-1.50878	0	3.14321	0	-0.981798	0	0	-2.31354	0	0
YGR060W	ERG25	0	0	0	0	-2.94531	-2.30988	-2.31062	0	0	0	0	0	-2.65896
YGR065C	VHT1	0	0	0	0	-1.94535	0	-2.64793	0	0	0	0	0	-2.03995
YGR066C		0	0	0	-1.34158	2.7338	2.02614	2.84934	-1.41178	-2.06853	-2.48515	0	0	2.61642
YGR067C		0	0	1.89438	0	0	0	0	1.6207	0	2.03089	0	0	0
YGR068C	ART5	0	0	1.50948	0	0	0	0	0	0	0	0	0	0
YGR070W	ROM1	0	1.43088	0	0	0	0	0	0	0	0	0	0	0
YGR079W		0	0	0	0	0	0	0	0	0	0	0	0	1.76643
YGR082W	TOM20	0	0	-1.3723	-1.19989	-1.99179	0	-1.7667	0	0	0	0	-1.14801	-1.95574
YGR084C	MRP13	0	0	0	0	-1.81399	0	0	0	0	0	0	-1.0695	-1.7714
YGR085C	RPL11B	0	0	0	-1.71407	0	0	0	0	0	0	0	0	-2.29031
YGR087C	PDC6	0	0	-4.27491	-2.45908	0	0	0	-2.99828	-3.85109	-1.50571	-1.31556	-1.44927	4.01234
YGR088W	CTT1	0	0	-2.82134	-3.56417	0	0	0	-3.69499	-2.62817	-4.10325	0	0	0
YGR096W	TPC1	0	0	0	0	0	0	0	0	0	0	0	0	2.26764
YGR108W	CLB1	0	0	0	0	-2.02181	-3.23191	0	0	0	-1.50916	0	0	0
YGR111W		0	0	0	0	0	0	0	0	0	-1.07385	0	0	0
YGR123C	PPT1	0	-1.06873	0	0	0	0	-2.11056	0	0	0	0	0	0
YGR127W		0	0	0	0	0	1.97203	1.88658	0	0	0	0	0	0
YGR129W	SYF2	0	0	0	0	0	0	0	0	0	0	0	0	1.95191
YGR131W	FHN1	0	0	0	0	0	0	0	-1.54454	0	0	0	0	0
YGR136W	LSB1	0	0	0	0	0	0	0	0	0	0	-1.69787	0	0
YGR138C	TPO2	0	2.28339	2.18049	1.25526	0	0	0	2.34297	0	2.33992	2.54972	1.23472	0
YGR139W		0	3.63188	2.87557	0	2.92575	0	0	3.08145	0	0	2.81605	0	3.60004
YGR142W	BTN2	0	0	0	0	2.70294	2.65984	0	-1.00644	-1.36803	0	-1.23325	0	2.63294
YGR144W	THI4	0	0	0	0	2.31596	2.43163	2.22493	-1.1899	0	0	0	0	2.99867
YGR146C	ECL1	0	1.25184	0	0	0	0	0	0	0	0	0	0	0
YGR148C	RPL24B	0	-1.65507	0	-2.08416	-2.18755	0	-2.29518	0	0	0	-1.62641	-1.52083	-2.33714
YGR149W		0	0	0	0	0	0	0	0	0	-1.19223	0	0	0
YGR150C	CCM1	0	0	0	-1.17129	0	0	0	0	0	0	0	0	0
YGR152C	RSR1	0	0	0	0	-2.42933	-2.68807	0	0	0	0	0	0	-2.07699
YGR154C	GTO1	0	0	-1.76515	-1.51961	0	0	0	-1.83247	-1.68619	0	0	0	0
YGR155W	CYS4	0	0	-1.64071	0	0	0	0	0	0	0	0	0	0
YGR157W	CHO2	0	0	-2.20716	0	0	0	0	0	0	0	0	0	0
YGR159C	NSR1	0	-2.03715	0	-1.79836	0	0	-3.3046	0	0	0	0	0	0
YGR161C	RTS3	0	-1.47997	0	0	0	0	0	0	-2.11884	0	0	0	0
YGR161W-B		0	0	0	0	0	0	0	-1.74496	-1.19788	-2.48272	0	0	0
YGR161W-C		-0.40088	-1.68092	-1.36431	0	0	0	0	0	-1.03989	0	-1.25861	0	0
YGR162W	TIF4631	0	0	0	0	0	0	-2.11173	0	0	0	0	0	0
YGR165W	MRPS35	0	0	0	0	0	0	0	0	0	0	0	-1.1479	0
YGR168C		0	0	0	0	0	1.74046	0	0	0	0	0	1.11038	0
YGR174W-A		1.15755	0	0	0	2.80035	2.63827	2.92747	0	0	0	1.81877	0	2.43861
YGR185C	TYS1	0	0	0	0	-2.34599	0	0	0	0	0	0	0	-2.17536
YGR187C	HGH1	0	0	0	0	0	0	-1.78764	0	0	0	0	0	0
YGR189C	CRH1	0	0	0	0	-2.38265	-3.40414	0	0	0	0	0	0	0
YGR192C	TDH3	0	-2.4906	-2.90524	0	0	0	0	-2.74288	0	-3.98277	0	0	0
YGR194C	XKS1	0	0	0	0	-1.89795	-2.17676	0	0	0	0	0	0	0
YGR197C	SNG1	-0.452406	0	0	0	0	0	0	0	0	0	0	0	0
YGR201C		0	0	0	0	0	1.97201	0	0	-0.947149	-1.45997	0	0	0
YGR205W		0	0	-1.43324	0	0	0	0	-0.912176	0	-1.0448	0	0	0
YGR207C		0	0	0	0	0	0	-2.26574	0	0	0	0	0	-1.85352
YGR208W	SER2	0	0	0	0	-2.41792	-1.91629	-2.49999	0	0	0	0	0	-2.55654
YGR214W	RPS0A	0	0	0	-1.87013	0	0	0	0	0	0	0	0	0
YGR220C	MRPL9	0	0	-1.49447	0	0	0	0	0	0	0	0	0	0
YGR230W	BNS1	0	0	0	0	0	0	0	-1.07783	0	0	0	0	0
YGR234W	YHB1	0	0	0	0	-5.01869	-4.14383	-5.32514	0	0	0	0	-2.98722	-3.71577
YGR236C	SPG1	0	0	0	0	6.48713	7.48925	6.36528	-1.75765	-1.95235	0	0	3.19585	6.6596
YGR239C	PEX21	0	0	0	1.44645	0	0	0	0	1.34929	1.75248	0	0	0
YGR240C-A		0	0	0	0	0	0	0	0	0	-2.33533	0	0	0
YGR243W	FMP43	0	0	0	0	2.38607	2.16919	2.71138	0	0	0	0	1.30038	0
YGR248W	SOL4	0	-1.53598	-2.09079	0	0	0	0	-2.39638	-1.6622	-2.79369	0	0	0
YGR249W	MGA1	0	2.36285	0	0	0	0	0	0	0	0	3.54433	0	0
YGR254W	ENO1	0	-3.11049	-4.46195	-2.52611	0	0	0	-3.26235	-1.62462	-3.87391	0	0	0
YGR255C	COQ6	0	0	0	0	0	0	0	0	0	-1.33057	0	0	0
YGR256W	GND2	0	-1.93193	-4.12926	-2.75262	0	0	0	-2.64417	-2.56628	-3.7031	-1.98195	-1.63739	0
YGR260W	TNA1	0	0	-1.83896	0	0	0	-2.696	0	0	0	0	-1.89903	0
YGR273C		0	0	-2.71648	0	0	0	-3.66347	0	0	0	0	0	0
YGR279C	SCW4	0	0	0	0	-4.39202	-4.2193	-3.24564	0	0	0	0	0	-3.24205
YGR280C	PXR1	0	0	1.58229	0	0	0	0	0	0	0	0	0	0
YGR281W	YOR1	0	0	0	0	0	0	0	-1.15962	-1.28196	0	0	-1.15528	0
YGR285C	ZUO1	0	0	0	0	-2.19002	-2.03847	-2.18152	0	0	0	0	0	0
YGR286C	BIO2	0	0	0	0	0	-1.75611	0	0	0	0	0	0	-2.31638
YGR287C	IMA1	0	0	0	0	0	0	0	0	0	0	3.06459	0	1.86592
YGR288W	MAL13	0	0	0	1.27296	0	0	0	0	0	0	1.59844	0	0
YGR289C	MAL11	0	0	0	0	0	0	0	0	0	0	-8.7009	0	0
YGR292W	MAL12	0	0	-2.33179	0	0	0	0	0	0	0	-1.71427	-1.56644	-2.56039
YHL001W	RPL14B	0	0	0	-1.77886	0	0	0	0	0	0	-1.46133	0	0
YHL004W	MRP4	0	0	-1.8655	-1.2828	0	0	-1.83769	0	0	0	0	0	0
YHL015W	RPS20	0	0	0	-2.28169	0	0	-2.79246	0	0	0	-1.77553	-1.5993	-2.43956
YHL016C	DUR3	0	0	0	0	0	0	0	0	0	0	2.76192	0	0
YHL021C	AIM17	0	0	-1.93771	0	0	0	0	0	0	-1.53521	0	0	0
YHL022C	SPO11	0	-2.03443	0	0	0	-1.99887	0	0	0	-1.45068	-1.77265	-1.46614	0
YHL028W	WSC4	0	0	0	0	0	0	0	0	0	0	1.58176	0	0
YHL033C	RPL8A	0	-1.72336	0	-2.3801	-2.29119	0	-2.37956	0	0	0	-1.60255	-1.49341	-2.13904
YHL036W	MUP3	0	0	-1.35418	0	0	0	0	0	0	0	0	0	0
YHL040C	ARN1	0	1.97932	0	0	0	0	0	0	0	1.31369	0	0	2.03212
YHL044W		0	1.61428	0	1.52864	0	0	0	0	0	0	0	0	0
YHL045W		0	2.53449	0	0	0	0	0	0	0	0	0	0	0
YHL046C	PAU13	0	2.78339	0	0	0	0	2.8329	0	0	0	0	0	0
YHL047C	ARN2	0	1.44822	0	0	0	0	0	0	0	0	0	0	2.55163
YHR005C	GPA1	0	0	0	-1.93321	0	0	0	0	0	0	0	0	0
YHR005C-A	TIM10	0	-1.14564	-1.5256	-1.5652	-1.85849	-1.71406	-1.9832	0	0	0	-1.35199	-1.35554	-2.21467
YHR010W	RPL27A	0	0	0	-1.90557	-2.1756	0	-2.68695	0	0	0	-1.57482	0	-2.58818
YHR016C	YSC84	0	0	0	0	0	0	0	0	0	-1.07409	0	0	0
YHR018C	ARG4	0	0	0	0	-2.51135	-3.20551	-3.20843	0	0	0	0	0	0
YHR019C	DED81	0	0	0	0	-2.20334	0	-2.5174	0	0	0	0	0	0
YHR020W		0	0	0	0	0	0	-2.10806	0	0	0	0	0	0
YHR021C	RPS27B	0	-1.58718	0	-1.946	0	0	-2.27408	0	0	0	-1.48381	-1.31194	-2.06424
YHR023W	MYO1	0	0	0	0	0	-2.33613	0	0	0	0	0	0	0
YHR024C	MAS2	0	0	0	0	0	0	-2.33764	0	0	0	0	0	-1.76873
YHR025W	THR1	0	0	0	0	0	0	-1.93843	0	0	0	0	0	0
YHR033W		0	0	0	0	0	0	0	0	0	-1.23884	0	0	0
YHR043C	DOG2	0	-1.68833	-1.27204	-1.14965	-2.77175	-2.50821	-2.0994	0	0	-1.58549	0	0	-2.66901
YHR044C	DOG1	0	-1.57403	-1.51945	0	0	0	0	0	0	-1.58428	0	0	0
YHR047C	AAP1	0	0	0	0	-1.81862	-1.85743	0	0	0	0	0	0	0
YHR048W	YHK8	-0.713385	0	1.5151	0	0	0	0	0	0	0	0	0	0
YHR050W-A		0	0	0	2.31518	0	0	0	1.47391	0	1.60406	0	0	0
YHR054C		0.372051	0	0	0	0	0	-2.55376	-2.18183	-1.01427	-1.31215	0	-2.36339	0
YHR059W	FYV4	0	0	0	-1.32372	0	0	0	0	0	0	0	0	0
YHR063C	PAN5	0	0	0	0	-2.61597	-2.18132	-1.92887	0	0	0	0	0	-2.29104
YHR065C	RRP3	0	0	0	0	0	0	-1.69484	0	0	0	0	0	0
YHR068W	DYS1	0	-1.20627	0	0	-2.05751	-1.69629	-1.69084	0	0	0	0	0	-2.10353
YHR071W	PCL5	0	0	1.74254	0	0	0	0	0	1.10394	0	1.61872	2.08344	0
YHR084W	STE12	0	0	0	0	-2.02496	0	-2.41623	0	0	0	-1.27483	-1.1004	0
YHR087W	RTC3	0	0	-2.64824	0	0	2.11589	0	-2.41038	-2.21177	-2.8728	0	0	2.64782
YHR089C	GAR1	0	0	0	0	-2.50513	-1.72477	-2.93185	0	0	0	0	0	-3.11052
YHR092C	HXT4	0	6.51097	3.0907	1.90253	3.76722	4.36882	3.61943	6.52724	6.68229	5.68946	3.70652	0	0
YHR093W	AHT1	0	0	0	0	0	0	0	0	0	1.53277	0	0	0
YHR094C	HXT1	0	5.39824	0	0	2.10398	2.14623	0	0	0	1.56136	0	0	0
YHR096C	HXT5	0	0	0	0	0	0	0	0	-1.58636	0	0	0	0
YHR097C		0	0	0	0	0	0	0	0	-1.10895	0	0	0	0
YHR104W	GRE3	0	0	-1.9688	0	0	0	0	-1.66323	-1.41214	-1.81078	0	0	0
YHR112C		0	0	-1.61612	0	0	0	0	0	0	0	0	0	0
YHR116W	COX23	0	0	-2.24734	0	0	0	0	0	0	0	0	0	0
YHR123W	EPT1	0	-1.33848	-1.48515	0	-3.44964	-2.4402	-2.19484	0	0	-1.06269	-1.20196	0	-3.64954
YHR126C	ANS1	0	-4.88404	-5.24538	-3.32439	-2.7728	-4.13445	0	-3.58546	-3.62182	-3.34849	-4.70509	-2.71242	0
YHR128W	FUR1	0	0	0	-2.0082	-2.42874	-2.76171	-2.88482	1.64616	0	0	-1.81195	-1.08146	-2.49522
YHR130C		0	0	0	0	0	0	0	0	0	1.9674	0	0	0
YHR132W-A	IGO2	0	0	0	0	0	0	2.05773	0	0	0	0	0	0
YHR136C	SPL2	0	2.00034	2.47394	4.44156	3.2596	3.05521	3.18757	0	2.93644	2.13252	0	1.98159	2.81443
YHR137W	ARO9	0	1.59223	0	0	0	0	2.85598	0	0	0	-1.96554	2.33611	0
YHR139C	SPS100	0	-2.04893	-2.58912	-2.38829	0	0	0	-3.32896	-3.59299	-2.82492	-2.30853	-2.93445	0
YHR140W		0	0	-1.87997	0	0	0	0	-1.95411	0	-1.12099	-1.6138	-1.69129	0
YHR141C	RPL42B	0	0	0	-1.55993	0	0	0	0	0	0	0	0	0
YHR143W	DSE2	0	-4.83354	-3.92252	-4.43552	-4.29831	-4.41145	-4.67819	-5.01892	0	-4.61882	-3.1686	-4.70764	-2.94468
YHR144C	DCD1	0	0	0	0	0	-2.32455	0	0	0	0	0	0	0
YHR145C		0	0	2.22028	0	2.88859	0	0	2.4449	2.30801	0	0	2.55197	0
YHR147C	MRPL6	0	0	-1.35933	0	0	0	0	0	0	0	0	0	0
YHR149C	SKG6	0	0	0	0	-1.99768	-2.35901	-1.91896	0	0	0	0	0	0
YHR153C	SPO16	0	0	0	-1.65875	0	0	0	0	0	0	0	0	0
YHR157W	REC104	0	0	0	0	0	2.20543	0	0	0	0	0	0	0
YHR160C	PEX18	0	0	0	0	2.31018	1.84407	1.9681	0	0	0	0	0	0
YHR163W	SOL3	0	-2.20777	-2.03024	0	-3.31708	-2.94898	-2.40042	0	0	-2.25311	-2.20764	0	-2.29816
YHR174W	ENO2	0	-4.01797	-5.26531	-3.62378	0	0	0	-4.52549	0	-4.98039	-2.74331	0	0
YHR176W	FMO1	0	0	-1.77824	0	0	0	0	0	0	0	0	-1.22138	0
YHR177W		0	0	0	1.2917	0	0	0	0	0	0	1.39632	0	0
YHR183W	GND1	0	-3.77995	-3.15692	0	-4.51617	-3.71157	-3.03422	0	0	-3.11787	-3.38169	0	-3.11339
YHR184W	SSP1	0	0	0	0	0	0	-2.12846	0	0	0	0	0	0
YHR197W	RIX1	0	0	0	0	0	0	0	0	0.945607	0	0	0	0
YHR208W	BAT1	0	0	0	0	-3.6932	-2.96483	-3.2323	0	0	0	0	0	-2.94484
YHR214C-D		0	0	-3.16116	0	0	0	0	-1.91295	0	0	0	0	0
YHR214C-E		0	0	-4.39273	0	0	0	-4.90406	-3.41288	-1.85628	0	0	-2.23339	0
YHR214W		0	1.85028	0	1.94656	0	0	2.31372	1.31742	1.98356	1.32248	0	3.04691	0
YHR214W-A		0	1.63055	0	1.77339	2.10534	0	2.07236	0	1.88609	0	0	3.02765	0
YHR215W	PHO12	0	0	0	1.1749	0	0	0	0	0.930241	0	0	0	0
YHR216W	IMD2	0	-1.3889	-3.0437	0	0	-1.69774	-1.89746	0	0	0	-1.73053	0	0
YIL003W	CFD1	0	0	0	1.20289	0	0	0	0	0	0	0	0	0
YIL010W	DOT5	0	0	-1.32696	0	0	0	0	0	0	0	0	0	0
YIL011W	TIR3	0	2.17472	0	0	0	0	0	0	0	0	0	0	0
YIL012W		0	2.44706	0	0	0	0	0	0	0	0	0	0	0
YIL015W	BAR1	0	-2.29385	-1.49038	-2.92677	-2.50713	-3.41094	-3.69525	-2.77049	-3.08173	-2.59908	-2.17375	-2.49133	-2.02966
YIL018W	RPL2B	0	0	0	-2.0055	-2.65231	0	-2.86431	0	0	0	0	0	-2.8963
YIL029C		0	0	0	0	0	0	2.04802	0	0	0	0	0	0
YIL032C		0	0	2.54218	0	0	0	0	0	0	0	0	0	0
YIL042C	PKP1	0	1.56033	0	1.72914	0	0	0	1.2033	0.940114	1.28378	1.6427	1.5555	1.90274
YIL045W	PIG2	0	0	0	0	0	0	0	-0.927356	-0.964438	0	0	0	0
YIL050W	PCL7	0	0	-1.35176	0	0	0	0	0	0	0	0	0	0
YIL052C	RPL34B	0	-1.49447	0	-2.25618	0	0	-2.36568	0	0	0	-1.59186	-1.46233	-2.41613
YIL053W	RHR2	0	0	-1.61797	0	0	0	0	-1.47252	0	-1.55996	0	0	0
YIL055C		0	0	0	-1.17504	0	0	0	-1.19943	0	0	0	0	0
YIL056W	VHR1	0	0	0	0	0	0	0	0	1.35248	0	1.52518	0	0
YIL057C	RGI2	0	1.57901	0	0	4.86107	5.05739	5.88155	1.89335	-1.19122	1.22308	0	3.31803	4.8852
YIL066C	RNR3	0	0	0	0	2.46605	2.21451	0	0	0	0	0	0	2.85599
YIL069C	RPS24B	0	-1.37126	0	-1.97199	0	0	0	0	0	0	0	0	-2.21538
YIL070C	MAM33	0	0	-1.96137	-1.52003	-1.96265	0	-1.7403	0	0	0	0	-1.25448	-1.79635
YIL074C	SER33	0	0	-2.36947	0	0	0	-2.65282	0	0	0	0	0	0
YIL077C		0	0	0	0	0	0	0	0	-0.966407	0	0	0	0
YIL078W	THS1	0	0	0	0	-2.36704	0	0	0	0	0	0	0	-2.45792
YIL087C	AIM19	0	0	0	0	0	0	0	0	0	-1.02144	0	0	0
YIL088C	AVT7	0	0	-1.44302	0	0	0	0	0	0	0	0	0	0
YIL093C	RSM25	0	0	-1.34799	0	0	0	0	0	0	0	0	0	0
YIL094C	LYS12	0	0	0	0	-2.45992	-2.22145	-2.87788	0	0	0	0	0	-2.5427
YIL096C		0	0	0	0	0	0	0	0	1.06262	0	0	0	0
YIL098C	FMC1	0	0	-1.87337	0	0	0	0	0	0	0	0	0	0
YIL099W	SGA1	0	1.8823	0	1.84016	2.54195	0	3.52238	0	0	0	0	1.52754	2.92565
YIL100W		0	0	0	0	3.73168	0	0	0	0	0	0	0	0
YIL101C	XBP1	0	0	0	-1.2627	0	0	0	0	0	0	-1.28674	0	0
YIL102C		0	0	0	0	0	0	0	0	-2.1515	0	0	0	0
YIL111W	COX5B	0	-1.32087	0	-1.55891	0	0	2.32935	0	-1.61186	0	0	0	0
YIL113W	SDP1	0	0	0	0	0	0	0	-1.65284	0	0	0	0	0
YIL114C	POR2	0	0	0	0	0	0	0	-1.06901	0	0	0	0	0
YIL117C	PRM5	0	0	0	0	0	0	-1.77587	-1.14311	-1.39699	0	0	0	0
YIL118W	RHO3	0	-1.27621	0	0	0	0	0	0	0	0	0	0	0
YIL119C	RPI1	0	0	0	0	0	0	0	-2.0783	0	0	3.09816	0	0
YIL121W	QDR2	0	0	0	0	0	-1.95155	0	0	-1.42083	0	-1.78647	0	0
YIL123W	SIM1	0	0	0	0	0	-2.21302	0	0	0	0	0	0	0
YIL133C	RPL16A	0	0	0	-1.63604	0	0	0	0	0	0	0	-1.3345	0
YIL140W	AXL2	0	0	0	0	0	-1.85251	0	0	0	0	0	1.46678	0
YIL148W	RPL40A	0	0	0	-1.95152	0	0	0	0	0	0	0	0	-2.30627
YIL153W	RRD1	0	1.21653	0	0	0	0	0	1.0087	0.979116	0	0	1.65063	0
YIL154C	IMP2'	-0.352361	0	0	0	0	0	0	0	0	0	0	0	0
YIL158W	AIM20	0	0	0	0	0	-2.75644	0	0	0	0	0	0	0
YIL160C	POT1	0	2.1771	0	0	4.51748	3.77674	3.99311	-0.912696	0	0	0	2.58654	4.07842
YIL162W	SUC2	0	2.17095	2.78006	2.80315	3.10558	2.81963	3.11274	1.77278	1.49658	0	0	1.90615	4.4242
YIL163C		0	0	0	0	-2.91481	0	-2.7382	0	0	0	0	0	0
YIL166C		0	1.18723	2.26988	2.0271	0	0	0	0	0	1.14936	2.21743	1.14578	0
YIL169C		0	0	0	0	0	0	0	-1.43249	-1.47231	0	0	0	0
YIL171W		0	0	0	-1.99149	0	0	0	0	0	0	0	0	0
YIL172C	IMA3	0	0	0	0	2.67522	2.07332	2.91818	0	0	0	0	1.42221	2.37463
YIR005W	IST3	0	0	0	1.3003	0	0	0	0	0	0	1.29657	0	0
YIR014W		0	0	0	0	0	0	1.86713	0	0	0	0	0	1.81675
YIR016W		0	0	0	-1.32758	0	0	0	-1.41298	-1.17202	-1.16916	0	0	0
YIR018C-A		0	0	0	0	0	0	0	0	0	-1.88003	0	0	0
YIR027C	DAL1	0	0	-1.56706	0	0	0	-3.56447	0	0	0	0	0	0
YIR028W	DAL4	0	0	-1.74911	0	0	0	-2.04049	-1.15057	-1.01491	0	0	0	0
YIR029W	DAL2	0	0	-1.28987	0	0	0	-1.68988	0	0	2.02298	0	-1.23132	0
YIR030C	DCG1	0	-1.49364	-1.74318	0	0	0	-3.00043	0	0	0	0	-1.43858	0
YIR031C	DAL7	0	-1.23095	0	-1.29459	0	0	0	0	0	0	0	-1.38163	0
YIR032C	DAL3	0	0	-1.73641	0	-2.9621	-3.04134	-2.19173	0	0	0	0	-1.56643	-2.55164
YIR034C	LYS1	0	0	0	0	-3.41505	-3.18613	-3.48872	0	0	0	0	0	0
YIR038C	GTT1	0	0	-1.83063	0	0	0	0	-1.35588	-1.06923	0	0	0	0
YIR039C	YPS6	0	0	0	0	0	0	0	0	0	0	-1.66277	0	0
YIR041W	PAU15	0	3.04054	0	0	0	0	3.23242	0	1.84007	0	0	0	0
YIR043C		0	0	0	2.24577	0	0	0	0	0	0	0	0	0
YJL019W	MPS3	0	1.45986	0	1.38845	0	0	0	0	0	1.12793	1.39366	0	0
YJL026W	RNR2	0	0	-1.72559	0	0	0	0	0	0	0	0	0	0
YJL037W	IRC18	0	0	-2.09712	0	0	0	0	0	0	0	0	0	0
YJL043W		0	1.87632	0	0	0	0	0	0	0	0	0	0	0
YJL045W		0	0	-1.51769	0	0	2.68885	3.31451	0	-1.27589	0	0	0	0
YJL052W	TDH1	0	-3.39064	-3.86389	-1.7786	0	0	0	-3.74869	-2.44569	-3.50178	0	0	0
YJL056C	ZAP1	0	1.47195	0	0	0	0	3.23192	0	0	0	0	0	0
YJL060W	BNA3	0	0	-1.89929	0	0	0	0	-1.20905	0	-1.41489	0	0	0
YJL062W-A	COA3	0	0	-1.39228	-1.27056	0	0	0	0	0	0	0	0	0
YJL063C	MRPL8	0	0	-1.70425	-1.16856	0	0	0	0	0	0	0	0	0
YJL071W	ARG2	0	0	0	1.18145	0	0	0	0	1.01477	0	1.30924	0	0
YJL079C	PRY1	-0.332651	0	0	0	0	0	0	0	0	0	0	0	0
YJL080C	SCP160	0	0	0	0	-2.09326	0	0	0	0	0	0	0	0
YJL083W	TAX4	0	0	0	1.14817	0	0	0	0	0	0	0	0	0
YJL088W	ARG3	0	0	0	0	-3.13436	-3.44548	-3.60414	-1.58087	-1.14687	-1.60898	0	0	-2.75997
YJL089W	SIP4	0	2.38288	2.63155	2.23141	0	0	2.26212	1.22876	0	1.64464	2.4003	1.30492	0
YJL096W	MRPL49	0	0	-1.45132	0	0	0	0	0	0	0	0	-1.18049	0
YJL103C	GSM1	0	1.24436	0	0	0	0	0	0	0	0	0	0	0
YJL106W	IME2	0	1.22498	0	0	0	0	0	0	0	0	1.51244	0	0
YJL113W		0	1.11661	0	0	0	0	0	0	0	0	0	0	0
YJL114W		0	0	0	0	3.30754	2.6023	0	0	0	0	0	0	0
YJL116C	NCA3	0	0	-2.98962	-1.71076	0	0	0	-2.2086	-2.78412	-1.17843	-1.92231	-2.1337	0
YJL136C	RPS21B	0	-1.43732	0	-1.81004	-2.08835	0	-2.33586	0	0	0	-1.49293	-1.30928	-2.49039
YJL144W		0	0	0	0	2.57321	2.22648	2.21643	-1.46607	-1.66016	0	0	0	3.10769
YJL153C	INO1	0	0	-2.84778	0	-6.82772	-4.87237	-5.03915	0	0	0	0	-2.69349	-4.19059
YJL157C	FAR1	0	0	0	-1.87143	-2.33293	-2.68899	-2.23355	-1.36172	-1.0566	-1.16275	0	-1.83224	0
YJL158C	CIS3	0	0	0	-1.87299	-4.84578	-4.64764	-3.09316	0	0	0	0	0	-3.13065
YJL160C		-0.794195	0	0	0	0	0	0	0	0	0	0	0	0
YJL161W	FMP33	0	0	-1.57922	0	0	0	0	-1.0924	0	-1.23178	0	0	0
YJL163C		0	0	-1.38669	0	0	0	0	-1.33597	-1.69354	-1.64823	0	0	0
YJL164C	TPK1	0	0	-1.85681	-1.24391	0	0	0	-1.49774	-1.56312	-2.05889	-1.38607	0	0
YJL168C	SET2	0	0	0	0	0	0	0	0	0	0	0	-1.08533	0
YJL170C	ASG7	0	0	0	-1.67812	0	0	0	-1.36045	-1.69735	0	0	-1.41095	0
YJL171C		0	0	0	0	-2.36647	-2.33702	0	0	0	0	0	0	0
YJL172W	CPS1	0	0	0	0	-2.21086	-2.37631	0	-1.95324	-1.5074	0	0	-1.8676	0
YJL177W	RPL17B	0	-1.72973	0	-2.39249	0	0	-2.63277	0	0	0	-1.77166	-1.57391	-2.53285
YJL180C	ATP12	0	0	-1.40496	-1.10975	0	0	0	0	0	0	0	0	0
YJL181W		0	0	0	-1.32929	0	0	0	0	0	0	0	0	0
YJL185C		0	0	0	0	1.82071	1.91403	1.71999	0	0	0	0	0	1.90946
YJL190C	RPS22A	0	-2.13244	0	-2.74021	-3.30598	-2.66155	-3.84069	0	0	0	-2.13801	-2.07209	-3.62256
YJL191W	RPS14B	0	0	0	-1.68229	0	0	0	0	0	0	-1.35451	0	0
YJL192C	SOP4	0	0	0	0	-1.96953	0	-1.81264	0	0	0	0	0	0
YJL196C	ELO1	0	-1.19809	0	0	-2.68142	-2.95856	0	-1.05858	0	-1.48128	-1.39984	-1.53998	-2.11723
YJL200C	ACO2	0	0	0	0	-4.39646	-3.61345	-4.79547	0	0	0	0	0	-3.35333
YJL208C	NUC1	0	0	0	0	-2.87362	-2.1313	-2.63398	0	0	0	0	0	-2.36051
YJL212C	OPT1	0	0	0	0	1.9718	3.57746	0	0	0	0	0	0	2.32502
YJL213W		0	0	0	1.66627	0	0	0	0	1.16563	0	0	0	0
YJL215C		0	0	0	0	0	0	0	0	0	0	-2.85828	0	0
YJL216C	IMA5	0	2.14386	0	0	0	2.44295	0	1.10486	2.06702	2.16265	2.82443	0	0
YJL218W		0	1.62835	0	0	-2.44027	-4.01193	-2.40794	0	0	0	2.98895	0	0
YJL219W	HXT9	0	0	0	0	2.3253	0	0	0	0	0	0	0	0
YJL221C	IMA4	0	0	0	0	2.70228	2.086	2.90631	0	0	0	0	1.46796	2.39611
YJR008W		0	0	-1.76785	0	0	0	0	0	0	0	0	0	0
YJR009C	TDH2	0	-3.14184	-3.6044	-2.51109	0	0	0	-3.42871	0	-4.04719	0	0	0
YJR010W	MET3	0	0	-4.46081	-2.14809	-3.38604	-2.45561	-3.30585	0	0	0	-2.88152	0	0
YJR016C	ILV3	0	0	0	0	0	-2.329	0	0	0	0	0	0	0
YJR019C	TES1	-0.458479	0	0	0	0	0	0	0	0	0	0	0	0
YJR025C	BNA1	0	0	0	0	0	0	-2.59407	0	0	0	0	0	0
YJR047C	ANB1	0	4.97881	0	0	3.20808	0	0	0	0	0	0	0	3.80496
YJR048W	CYC1	0	0	0	0	-6.65666	-4.54089	-6.43565	0	0	0	0	-2.57221	-4.60739
YJR056C		0	0	0	0	2.33349	1.8776	0	0	0	0	0	0	1.74068
YJR069C	HAM1	0	0	0	0	-3.18315	-2.31206	-2.14258	0	0	0	0	0	-2.84359
YJR070C	LIA1	0	0	0	0	0	0	0	0	0	0	0	0	-2.25408
YJR073C	OPI3	0	0	-2.88428	0	0	-2.95192	0	0	0	0	0	0	0
YJR077C	MIR1	0	0	0	0	-2.65956	-2.37339	-2.96319	0	0	0	0	0	0
YJR085C		0	0	-1.31068	0	0	0	0	0	0	0	0	0	0
YJR094C	IME1	0	2.60962	1.57141	2.92729	0	0	2.90318	0	0	1.55145	4.02373	2.94885	2.259
YJR094W-A	RPL43B	0	0	0	-2.09838	0	0	-2.04849	0	0	0	-1.39269	0	0
YJR095W	SFC1	0	2.42939	2.43916	2.69496	0	0	0	2.17769	0	2.5542	2.67478	0	0
YJR096W		0	0	0	0	0	0	0	0	-1.29509	-1.1912	0	0	0
YJR101W	RSM26	0	-1.11461	-1.47324	-1.21391	-1.81685	0	-2.19187	0	0	0	-1.23744	-1.34648	-1.88783
YJR105W	ADO1	0	0	0	0	-3.61922	-3.06901	-3.21337	0	0	0	0	0	-3.21018
YJR109C	CPA2	0	0	0	0	-3.14688	-3.04979	-3.33099	0	0	0	0	0	0
YJR111C		0	0	2.03344	1.61877	0	0	0	0	1.08123	0	2.10324	0	0
YJR115W		0	0	0	-1.85917	0	3.45192	2.60615	0	0	0	2.09433	0	2.68453
YJR118C	ILM1	0.392585	0	0	0	0	0	0	0	0	0	0	0	0
YJR124C		0	0	0	0	-2.18976	-2.02514	-2.34358	0	0	0	0	0	0
YJR130C	STR2	0	0	0	1.71134	0	0	0	0	0	0	1.7923	0	0
YJR133W	XPT1	0	-1.12909	-1.37577	0	0	0	0	0	0	0	0	0	0
YJR137C	MET5	0	0	-2.43915	0	0	0	0	0	0	0	0	0	0
YJR145C	RPS4A	0	0	0	-2.16831	0	0	-2.49994	0	0	0	0	0	-2.41105
YJR148W	BAT2	0	0	-1.5385	0	0	0	0	-1.34244	-1.21113	0	0	0	0
YJR150C	DAN1	0	3.37665	0	0	2.74289	0	0	0	0	0	0	0	3.37996
YJR152W	DAL5	0	0	0	0	0	0	0	0	-1.48138	2.44001	1.99162	-1.35002	0
YJR154W		0	0	0	1.36405	0	0	0	0	0	0	1.42823	0	0
YKL001C	MET14	0	-1.67098	-3.56254	-2.08541	-2.40642	-2.17142	-2.71354	0	0	0	-2.75853	0	0
YKL006W	RPL14A	0	-1.96647	0	-2.27826	-2.67643	-2.05067	-3.00919	0	0	0	-1.912	-1.52711	-2.76272
YKL009W	MRT4	0	-1.2286	0	0	0	0	0	0	0	0	0	0	0
YKL023C-A		0	0	0	-1.85111	0	0	0	0	0	0	0	0	0
YKL023W		0	0	0	0	0	0	0	0	0	0	1.15821	0	0
YKL026C	GPX1	0	0	-1.38606	0	0	1.99688	0	-1.09746	-1.02032	0	0	0	2.22981
YKL027W		0	0	0	-1.13958	0	0	-1.69084	0	0	0	0	0	0
YKL029C	MAE1	0	1.6414	0	0	0	0	-2.55985	0	1.91035	1.55646	1.88672	0	0
YKL031W		0	6.46006	4.58505	5.83729	0	0	0	3.14194	0	5.42017	6.08767	2.60778	5.13422
YKL032C	IXR1	0	2.49253	1.47268	2.10662	0	0	0	0	0	1.81979	2.28764	0	0
YKL033W-A		0	-1.28688	0	0	-4.40943	-3.67615	-4.1119	0	0	0	0	0	-1.94377
YKL035W	UGP1	0	0	0	0	0	0	0	0	-1.22911	-1.98166	0	0	0
YKL043W	PHD1	0	0	0	0	0	0	0	-1.15601	-1.66856	0	0	0	0
YKL044W		0	0	0	1.31824	0	0	0	0	-1.41885	0	0	0	0
YKL050C		0	0	0	0	1.97362	1.93827	2.78449	0	0	0	0	0	2.90898
YKL056C	TMA19	0	0	0	0	0	0	-2.59467	0	0	0	0	0	0
YKL060C	FBA1	0	0	-3.71058	0	0	0	0	0	0	0	0	0	0
YKL065W-A		0	0	0	0	4.29164	4.73054	5.06968	-2.0616	-1.90172	-2.0495	0	0	4.83586
YKL067W	YNK1	0	0	-1.42358	0	0	0	0	0	0	0	0	0	0
YKL068W-A		0	0	-2.14715	-1.78156	0	0	0	-1.24824	-1.01232	0	-2.32368	0	0
YKL072W	STB6	0	0	0	0	0	0	1.89115	1.07993	0	0	0	0	0
YKL081W	TEF4	0	0	0	0	-2.49164	0	0	0	0	0	0	0	0
YKL086W	SRX1	-1.03249	0	0	0	0	0	0	0	0	0	0	0	0
YKL091C		0	-1.09285	-1.57966	0	0	0	0	-0.998895	-1.21809	-1.46639	0	0	0
YKL096C-B		0	0	0	0	3.21072	3.14916	0	0	0	0	0	0	3.45771
YKL096W	CWP1	0	0	-2.2562	-1.53266	-2.86187	-3.89009	0	-2.22714	0	-1.49411	-2.88908	-1.86243	0
YKL096W-A	CWP2	-0.586847	0	0	0	0	-3.50501	0	0	0	0	0	0	0
YKL097C		0	0	3.10656	0	0	0	0	0	0	0	0	0	3.13507
YKL105C		0	1.52815	0	0	0	0	0	0	0	0	0	0	0
YKL106C-A		0	0	0	0	0	0	2.76212	0	0	0	0	0	0
YKL107W		0	0	-2.11032	-1.5657	0	0	3.14281	-2.18436	-2.66933	-2.10688	0	0	2.4672
YKL109W	HAP4	0	0	0	0	-2.56838	-2.16568	-3.48376	0	0	0	0	0	-2.09966
YKL120W	OAC1	0	-1.53384	-1.39271	0	-2.94445	-2.72318	-3.10425	0	0	0	0	-1.10995	-2.62353
YKL138C	MRPL31	0	0	-1.55931	-1.38801	0	0	0	0	0	0	0	0	0
YKL149C	DBR1	0	0	0	0	1.86587	0	0	0	0	0	0	0	0
YKL151C		0	0	0	0	0	0	0	-1.27483	-1.18836	-1.59095	0	0	0
YKL152C	GPM1	0	0	-4.54755	0	0	0	0	-3.72316	0	-4.2568	0	0	0
YKL155C	RSM22	0	0	0	0	0	0	-1.82315	0	0	0	0	-1.03324	0
YKL156W	RPS27A	0	-1.43103	0	-1.27872	0	0	0	0	0	0	0	0	0
YKL164C	PIR1	0	0	0	0	0	-2.82328	0	0	0	0	0	0	0
YKL165C	MCD4	0	-1.27842	-1.71929	-1.8744	-3.06991	-2.36983	-1.82155	0	0	0	0	-1.17634	-2.65827
YKL178C	STE3	0	0	0	0	0	0	-2.1676	0	0	0	0	0	0
YKL180W	RPL17A	0	-1.76753	0	-1.98712	-2.3018	0	-2.61594	0	0	0	0	-1.53967	-2.52901
YKL185W	ASH1	0	0	0	-1.41595	0	-2.90954	0	0	0	0	0	0	0
YKL187C		0	0	0	-1.54064	0	0	0	0	-1.22925	0	0	0	0
YKL188C	PXA2	0	0	0	0	2.11352	1.92615	2.42679	0	0	0	0	1.37371	2.13918
YKL192C	ACP1	0	0	-1.52481	0	0	0	0	0	0	0	0	0	0
YKL194C	MST1	0	0	0	0	-2.47562	-2.51879	-2.0984	0	0	0	0	0	-2.35908
YKL198C	PTK1	0	1.61903	0	0	1.93537	1.71418	0	0	0	0	0	0	1.7397
YKL201C	MNN4	0	0	-1.79064	0	0	0	0	0	0	0	0	0	0
YKL209C	STE6	0	0	0	-1.55796	0	0	0	0	-1.3223	0	0	0	0
YKL211C	TRP3	0	0	0	0	0	-1.73184	0	0	0	0	1.61404	0	-1.93351
YKL212W	SAC1	0	0	0	0	-2.63098	-2.27606	-2.32481	0	0	0	0	0	-2.19069
YKL214C	YRA2	0	0	0	0	0	0	0	-1.35747	0	0	0	0	0
YKL217W	JEN1	0	2.54025	0	0	0	0	0	0	0	0	2.30788	2.09241	0
YKL218C	SRY1	0	0	0	0	0	0	0	0	1.25076	0	1.72165	0	0
YKL221W	MCH2	0	0	0	0	0	0	0	0	-1.24688	0	0	0	0
YKL224C	PAU16	0	3.23563	0	0	0	0	3.14711	0	0	0	0	0	0
YKR003W	OSH6	0	0	0	0	0	0	0	0	0	-1.23629	0	0	0
YKR009C	FOX2	0	2.00915	0	0	3.03435	2.82822	3.49807	0	0	1.37051	0	2.21622	3.17607
YKR016W	FCJ1	0	0	0	0	-3.22308	-3.14464	-3.44587	0	0	0	0	0	-2.55436
YKR024C	DBP7	0	0	0	0	0	0	0	0	1.08711	0	0	0	0
YKR034W	DAL80	0	-2.39483	-2.68187	0	0	0	0	-1.55917	-1.64853	0	0	-1.92177	-2.28254
YKR041W		0	0	2.20583	0	0	0	0	0	0	1.86503	2.5289	2.09203	0
YKR043C		0	0	0	0	-2.12571	-1.90163	0	0	0	0	0	0	-1.85595
YKR049C	FMP46	0	0	-1.39755	0	0	0	0	0	0	0	0	0	0
YKR050W	TRK2	0	0	0	0	0	2.08087	0	0	0	0	0	0	1.95504
YKR057W	RPS21A	0	-1.46476	0	-1.94682	-2.0263	0	-2.12137	0	0	0	-1.8386	0	-1.99439
YKR065C	PAM17	0	0	-1.45757	0	0	0	0	0	0	0	0	0	0
YKR069W	MET1	0	-1.39444	-1.94002	0	0	0	-2.06345	0	0	0	-1.44296	0	0
YKR075C		0	3.35496	0	0	4.80918	4.48052	3.69754	2.45665	2.43516	2.13722	2.54462	0	2.38149
YKR076W	ECM4	0	0	-1.92746	0	0	0	0	-1.14177	0	0	0	0	0
YKR077W	MSA2	0	0	0	-1.0916	0	0	0	0	0	0	0	0	0
YKR080W	MTD1	0	0	0	0	0	0	-1.82063	0	0	0	0	0	0
YKR085C	MRPL20	0	0	-1.3887	0	-1.86469	0	0	0	0	0	0	0	-1.9672
YKR092C	SRP40	0	-1.16138	0	0	-1.82084	0	-2.36017	0	0	0	0	0	-1.85441
YKR093W	PTR2	0	-1.57065	-1.31109	-1.32371	0	0	0	-1.23947	-1.27051	-1.02122	-1.73451	-1.51244	0
YKR094C	RPL40B	0	-1.62137	0	-1.72189	0	0	0	0	0	0	0	0	0
YKR097W	PCK1	0	6.10472	4.70637	5.65433	0	0	0	4.83475	2.0661	6.53481	5.01938	0	0
YKR098C	UBP11	0	0	0	0	0	0	0	0.965524	0	0	0	0	0
YKR099W	BAS1	0	0	1.66842	1.2953	0	0	0	0	0.93468	0	1.84061	0	0
YKR106W		0	0	0	0	0	0	0	0	0	0	0	-1.71652	0
YLL008W	DRS1	0	0	0	0	0	0	0	0	1.14379	0	0	0	0
YLL009C	COX17	0	0	-1.68448	0	0	0	-2.08188	0	0	0	0	-1.24817	0
YLL012W	YEH1	0	0	0	-1.69457	-1.9552	0	-2.1585	0	0	0	0	0	0
YLL023C	POM33	0	0	0	0	0	0	0	-0.979971	0	0	0	0	0
YLL027W	ISA1	0	0	1.44223	0	0	0	0	0	0	1.28163	0	0	0
YLL052C	AQY2	0	0	0	0	0	0	0	0	2.84581	3.33838	4.76748	0	0
YLL053C		0	0	0	0	0	0	0	0	2.35915	3.07674	4.39603	0	0
YLL055W	YCT1	0	0	-1.3508	-1.72136	0	0	-2.30355	-2.40745	-2.78643	0	0	0	0
YLL056C		0	0	0	0	0	0	0	0	0	0	0	0	2.00404
YLL057C	JLP1	0	0	0	0	0	1.75629	0	0	-1.311	0	0	0	3.16945
YLL058W		0	0	1.5916	1.30693	0	0	0	0	0	0	1.60825	0	0
YLL061W	MMP1	0	0	-2.18478	0	0	0	0	0	0	0	-2.22351	0	0
YLL062C	MHT1	0	0	-3.50025	-1.82241	0	0	0	0	0	0	-2.43364	-1.0743	0
YLR008C	PAM18	0	0	0	0	-2.6109	-2.15171	-2.49888	0	0	0	-1.22986	0	-3.08172
YLR010C	TEN1	0	0	0	0	2.07813	2.0991	0	0	0	0	0	0	0
YLR012C		0	2.97318	0	0	0	0	4.87195	0	0	3.6228	0	0	0
YLR013W	GAT3	0	0	0	0	0	0	6.12077	0	0	0	0	0	0
YLR029C	RPL15A	0	0	0	-2.05918	-2.69159	0	-3.2767	0	0	0	0	0	-3.00024
YLR037C	PAU23	0	0	0	0	0	0	0	0	0	0	0	1.49146	0
YLR040C		0	0	0	0	0	0	0	0	-1.44895	0	0	0	0
YLR042C		0	0	0	0	0	-2.00817	-2.77589	-1.48378	-2.26742	-1.5455	-1.71435	0	0
YLR044C	PDC1	0	0	-3.79611	-2.88096	0	0	0	0	0	0	0	0	0
YLR048W	RPS0B	0	0	0	-1.74255	0	0	-2.38075	0	0	0	0	0	0
YLR049C		0	0	0	0	-2.02568	-2.99325	0	0	0	0	0	0	0
YLR053C		0	0	0	1.20271	0	0	0	0	0	1.7579	2.60992	0	0
YLR056W	ERG3	0	0	0	0	-3.67284	-2.61827	-3.41669	0	0	0	0	0	-2.83922
YLR058C	SHM2	0	0	0	0	0	0	-4.31151	0	0	0	0	0	-2.57736
YLR060W	FRS1	0	0	0	0	-2.91001	-2.13279	-2.80533	0	0	0	0	0	-2.57417
YLR061W	RPL22A	0	0	0	-2.34327	0	0	-3.31414	0	0	0	0	0	-3.21458
YLR062C	BUD28	0	0	0	-2.14403	0	0	-3.39948	0	0	0	0	0	0
YLR068W	FYV7	0	0	0	0	0	0	0	0	0	1.31823	0	0	0
YLR069C	MEF1	0	0	-1.50908	0	-2.2202	-1.90405	-2.34959	0	0	0	0	0	-2.24662
YLR070C	XYL2	0	1.08365	0	0	0	0	0	0	0	0	0	0	0
YLR080W	EMP46	0	0	0	0	0	0	0	0	-0.967306	0	0	0	0
YLR081W	GAL2	0	0	0	0	2.06486	0	0	0	0	0	0	0	0
YLR083C	EMP70	0	0	0	0	-1.98535	0	-2.02923	0	0	0	0	0	-1.86017
YLR084C	RAX2	0	0	0	1.51764	-1.98941	-2.51478	0	0	0	0	0	0	0
YLR090W	XDJ1	0	0	-1.69015	0	0	0	0	0	0	0	0	0	0
YLR092W	SUL2	0	0	-2.41898	0	0	0	0	0	0	0	0	0	0
YLR094C	GIS3	0	1.53992	0	0	0	0	0	0.920799	0	0	1.16686	0	0
YLR103C	CDC45	0	0	0	0	0	-2.0118	0	0	0	0	0	0	0
YLR108C		0	0	0	0	0	0	2.44649	0	0	-1.20559	0	0	1.81473
YLR110C	CCW12	0	0	0	0	-4.02796	-4.97963	0	0	0	0	0	0	0
YLR112W		0	-2.44819	0	0	-2.37527	-2.79138	0	0	0	-2.08979	0	-1.89876	0
YLR113W	HOG1	0	0	0	0	-2.52809	-2.45925	0	0	0	0	0	-1.26304	-1.99026
YLR120C	YPS1	0	0	0	0	0	0	0	0	0	0	0	1.4502	0
YLR121C	YPS3	0	0	0	0	0	0	0	0	0	0	0	1.23065	0
YLR125W		0	0	0	0	2.08206	0	0	0	0	0	0	0	0
YLR130C	ZRT2	0	0	0	0	0	0	2.56387	0	0	0	0	0	0
YLR132C		0	0	0	0	-2.00741	0	0	0	0	0	0	0	0
YLR133W	CKI1	0	0	0	0	-1.88705	0	0	0	0	0	0	0	0
YLR134W	PDC5	0	-1.57697	0	0	-3.07819	0	-2.24938	0	0	-1.3036	0	0	-1.91376
YLR136C	TIS11	0	1.39292	0	0	0	0	0	0	0	0	0	0	2.64498
YLR139C	SLS1	0	0	0	0	0	0	0	1.06375	0	0	0	0	0
YLR142W	PUT1	0	0	0	0	0	0	0	0	-1.65241	0	0	0	0
YLR151C	PCD1	0	0	0	0	0	0	1.82452	0	0	0	0	1.07168	0
YLR152C		0	0	0	0	0	0	0	-1.67881	-1.85343	0	0	-1.12316	0
YLR153C	ACS2	0	0	0	0	-2.88301	-3.10763	-2.62107	0	0	0	0	0	0
YLR155C	ASP3-1	-0.328106	0	0	0	0	0	0	0	-2.45321	0	-1.75027	0	0
YLR156W		0	0	0	0	0	0	0	0	-4.47593	0	-3.67303	0	0
YLR157C	ASP3-2	-0.328106	0	0	0	0	0	0	0	-2.45321	0	-1.75027	0	0
YLR157W-D		0	0	0	0	2.15936	0	0	0	-2.04931	0	-2.64725	0	0
YLR157W-E		0	0	0	0	0	-3.1058	0	-2.34058	0	0	-3.89447	0	0
YLR158C	ASP3-3	-0.328106	0	0	0	0	0	0	0	-2.45321	0	-1.75027	0	0
YLR159W		0	0	0	0	0	0	0	0	-4.47593	0	-3.67303	0	0
YLR160C	ASP3-4	-0.328106	0	0	0	0	0	0	0	-2.45321	0	-1.75027	0	0
YLR161W		0	0	0	0	0	0	0	0	-4.47593	0	-3.67303	0	0
YLR164W		0	0	0	0	2.51632	1.94665	3.12704	-2.0438	-2.01641	-1.66232	0	0	2.44847
YLR165C	PUS5	0	0	0	0	1.8225	0	0	0	0	0	0	0	0
YLR167W	RPS31	0	0	0	-2.41278	0	0	-3.29914	0	0	0	0	0	-2.59346
YLR168C	UPS2	0	0	0	0	-2.92536	-2.36938	-2.62239	0	0	0	0	-1.68987	-2.44332
YLR175W	CBF5	0	0	0	0	0	0	-2.60201	0	0	0	0	0	0
YLR177W		0	0	0	0	0	0	0	0	0	-1.54487	0	0	0
YLR178C	TFS1	0	0	-1.57694	0	0	0	0	-1.31037	-1.4166	-2.71276	0	0	0
YLR179C		0	0	0	-1.23321	-2.21624	-2.19765	-2.47686	0	0	0	-1.55662	0	0
YLR180W	SAM1	0	0	-1.50969	-1.58737	0	0	-5.38279	0	0	0	0	0	0
YLR183C	TOS4	0	0	0	0	0	-3.7825	0	0	0	0	0	0	0
YLR185W	RPL37A	0	-1.63622	0	-1.91276	-2.08983	0	-2.34603	0	0	0	-1.72847	-1.23784	-2.04985
YLR186W	EMG1	0	0	0	-1.21764	-2.19658	0	-1.73414	0	0	0	-1.2315	0	0
YLR190W	MMR1	0	0	0	0	0	-1.86324	0	0	0	0	0	0	0
YLR194C		0	0	0	0	0	0	0	0	0	0	0	1.57552	0
YLR197W	NOP56	0	0	0	0	-2.12614	0	-2.80132	0	0	0	0	0	-2.60111
YLR203C	MSS51	0	0	-1.4247	0	-1.8653	0	0	0	0	0	0	0	0
YLR205C	HMX1	0	0	1.42462	0	0	0	0	0	0	0	0	0	0
YLR218C	COA4	0	0	-1.63784	0	0	0	0	0	0	0	0	0	0
YLR222C	UTP13	0	0	0	0	0	0	-1.69039	0	0	0	0	0	0
YLR228C	ECM22	0	1.61214	0	0	0	0	0	0	0	0	0	0	0
YLR231C	BNA5	0	0	-1.89807	0	0	0	-2.66514	0	0	0	0	-1.30556	0
YLR249W	YEF3	0	0	0	0	0	0	-2.8893	0	0	0	0	0	0
YLR251W	SYM1	0	0	0	0	0	0	0	-1.54578	-1.26644	-1.91599	0	0	0
YLR253W		0	0	-1.53021	0	0	0	-1.86671	0	0	0	0	-1.18246	-1.97643
YLR255C		0	0	0	0	2.79627	0	0	0	0	0	0	0	3.8322
YLR258W	GSY2	0	0	-1.68832	0	0	0	0	-1.93904	0	-2.23093	0	0	0
YLR264C-A		0.525315	0	0	0	0	0	0	0	0	0	0	0	-2.76291
YLR264W	RPS28B	0	-1.10637	0	-1.25815	-2.27255	0	-2.40667	0	0	0	-1.7172	0	-2.34374
YLR265C	NEJ1	0	0	0	-2.37958	0	0	0	0	0	0	0	0	0
YLR267W	BOP2	0	1.70024	0	1.6157	2.84124	3.26967	2.86241	0	0	0	2.32925	1.2617	2.97368
YLR270W	DCS1	0	0	0	0	0	0	0	0	0	-1.34165	0	0	0
YLR279W		0	0	0	0	0	0	0	0	0	2.18833	0	0	0
YLR284C	ECI1	0	1.41062	0	0	3.56903	2.96463	3.13281	0	0	0	0	1.81499	2.23752
YLR286C	CTS1	0	-4.85763	-4.44312	-3.64861	-4.89799	-5.38706	-4.35167	-5.62922	0	-5.90262	-3.93862	-3.40843	-3.11628
YLR287C-A	RPS30A	0	0	0	-1.70467	0	0	0	0	0	0	-1.48217	0	0
YLR296W		0	0	0	0	0	0	0	0	0	2.11661	0	0	0
YLR300W	EXG1	0	0	0	0	-2.92366	-3.16844	0	0	0	0	0	0	0
YLR301W		0	0	0	0	-1.93321	-1.99122	0	0	0	-1.07418	0	0	-1.72475
YLR303W	MET17	0	0	-3.74063	0	0	0	0	0	0	0	0	0	0
YLR307C-A		0	4.08858	4.45208	4.35494	0	0	0	2.04592	-1.65555	3.98897	4.42941	1.93899	0
YLR308W	CDA2	0	2.39966	0	3.35115	0	0	0	0	-2.44354	2.24598	0	0	0
YLR311C		0	2.38683	0	1.90181	2.38037	2.96147	3.27203	1.42672	0	1.97764	1.79129	1.74216	0
YLR312C		0	0	0	0	0	0	0	0	-0.989856	0	0	0	0
YLR312W-A	MRPL15	0	0	0	-1.10992	0	0	0	0	0	0	0	-1.33864	-1.89987
YLR314C	CDC3	0	0	0	0	-2.08977	0	0	0	0	0	0	0	0
YLR325C	RPL38	0	-1.60872	0	-2.24588	0	0	-2.518	0	0	0	-1.79982	-1.358	-2.34718
YLR327C	TMA10	0	0	0	0	0	3.25507	2.71448	0	0	0	0	1.79469	3.09185
YLR333C	RPS25B	0	-1.44433	0	-1.53952	0	0	0	0	0	0	-1.54162	-1.14475	0
YLR337C	VRP1	0	1.45968	0	0	0	0	0	0	0	0	0	1.37665	0
YLR341W	SPO77	0	0	2.09964	0	0	0	0	0	0	0	1.63626	0	0
YLR342W-A		0	0	0	0	0	0	0	1.95739	0	0	0	0	0
YLR343W	GAS2	0	0	0	0	0	0	-2.24677	0	0	0	0	0	0
YLR344W	RPL26A	0	-1.30908	0	-1.54468	0	0	0	0	0	0	0	-1.26795	0
YLR346C		0	0	0	0	0	2.68677	0	0	-1.79083	0	0	0	0
YLR348C	DIC1	0	0	0	0	0	0	0	0	1.2967	0	0	0	0
YLR350W	ORM2	-0.539508	0	0	0	0	0	0	0	0	0	0	0	0
YLR354C	TAL1	0	0	-2.42646	0	-2.75968	-2.78335	0	0	0	0	0	0	0
YLR356W	ATG33	-0.332318	0	0	0	0	0	0	-1.16473	-0.953047	0	0	0	0
YLR359W	ADE13	0	0	0	0	0	0	-2.59615	0	0	0	0	0	0
YLR364W	GRX8	0	-1.3704	-2.96694	-2.18874	0	0	0	-1.04567	0	0	-2.68991	0	0
YLR367W	RPS22B	0	-1.2857	0	-1.95254	-2.24585	0	-2.08907	0	0	0	-1.79213	-1.15418	-2.41495
YLR372W	SUR4	0	-1.21873	0	-1.6955	-3.38373	-3.13977	-3.46825	0	0	0	0	-1.26597	-3.10495
YLR377C	FBP1	0	4.6529	2.70102	3.18889	0	0	0	3.34703	0	4.82966	2.77299	0	0
YLR388W	RPS29A	0	-1.93698	0	-2.28058	-2.10678	-2.18899	-2.52384	0	0	0	-1.78878	-1.77913	-2.55891
YLR390W-A	CCW14	0	0	0	0	-2.47074	-2.40012	0	0	0	0	0	0	0
YLR406C	RPL31B	0	-1.85592	0	-2.26422	0	0	-2.2795	0	0	0	-1.8054	-1.80421	-2.11467
YLR410W-B		0	0	0	0	0	0	0	-1.70018	-1.18491	-2.25238	0	0	0
YLR411W	CTR3	0	0	0	0	0	2.58401	0	0	0	0	0	0	0
YLR413W		0	0	0	0	0	0	0	0	0	-1.44002	0	0	0
YLR414C	PUN1	0	0	0	0	0	-2.19172	0	0	0	0	0	1.52056	0
YLR432W	IMD3	0	0	-1.48994	0	0	-1.90309	0	0	0	0	0	0	-2.1247
YLR435W	TSR2	0	0	0	0	0	0	-2.15248	0	0	0	0	0	0
YLR438W	CAR2	0	1.28511	0	0	2.41223	2.3276	2.64847	0	0	0	0	1.783	3.03667
YLR445W		0	0	0	0	0	0	0	0	0	0	0	0	2.85066
YLR448W	RPL6B	0	-1.56892	0	-1.94893	-2.63502	-2.12102	-2.68514	0	0	0	-1.82727	-1.48733	-2.38494
YLR452C	SST2	0	0	0	0	0	0	0	-0.932449	-1.11586	-1.10589	0	0	0
YML004C	GLO1	0	0	-1.62103	0	0	0	0	0	0	0	0	0	0
YML008C	ERG6	0	0	0	0	-3.19672	-2.7632	0	0	0	0	0	0	-2.4278
YML009C	MRPL39	0	0	-1.4848	0	0	0	0	0	0	0	0	-1.16709	0
YML018C		0	0	0	0	0	0	0	0	0	0	-1.48796	0	0
YML024W	RPS17A	0	-1.56911	0	-1.84468	-2.16981	0	-2.42583	0	0	0	-1.66171	-1.49962	-2.50379
YML026C	RPS18B	0	-1.53587	0	-1.99948	-2.2515	0	-2.56404	0	0	0	-1.69779	-1.48188	-2.45465
YML028W	TSA1	-0.48542	0	0	0	0	0	0	0	0	0	0	0	0
YML030W	AIM31	0	0	-1.32539	0	0	0	0	0	0	0	0	0	0
YML042W	CAT2	0	3.15125	2.58933	2.77472	0	0	0	1.67461	0	2.63074	2.43032	0	0
YML043C	RRN11	0	0	1.40269	0	0	0	0	0	0	0	0	0	0
YML052W	SUR7	0	-1.32001	0	0	-3.12127	-3.48547	0	0	0	-1.7113	0	0	-1.93464
YML054C	CYB2	0	0	0	-1.90117	0	0	0	0	0	0	0	0	0
YML054C-A		0	0	0	0	3.18605	0	0	0	0	0	0	0	2.671
YML056C	IMD4	0	-1.60043	0	-1.40025	-2.89588	-2.88512	-3.48938	0	0	0	0	0	-2.15494
YML058W	SML1	-0.353971	0	0	0	0	0	0	0	0	0	0	0	0
YML058W-A	HUG1	0	2.03141	0	0	0	0	0	0	0	0	0	0	3.54048
YML059C	NTE1	0	-1.24556	0	0	-2.89183	-2.72587	-2.96681	0	0	0	-1.21377	-1.35502	-2.00792
YML073C	RPL6A	0	0	0	-1.96616	0	0	0	0	0	0	-1.60895	0	0
YML079W		0	0	-1.28685	0	0	0	0	0	0	0	0	0	0
YML087C	AIM33	0	0	0	-1.22738	0	0	0	0	0	0	0	-1.25657	0
YML089C		0	2.35783	0	0	0	0	3.08095	0	0	2.01326	0	1.99724	3.82408
YML090W		0	2.04895	0	0	0	0	0	1.4129	0	1.93568	0	0	0
YML093W	UTP14	0	0	0	0	0	0	0	0	1.05845	0	0	0	0
YML100W	TSL1	0	0	0	0	0	0	0	-1.89148	-1.71701	-2.56967	0	0	0
YML106W	URA5	0	0	0	0	-1.98266	0	0	0	0	0	0	0	-2.02849
YML110C	COQ5	0	0	-1.38745	0	0	0	0	0	0	0	0	0	0
YML116W	ATR1	0	0	0	1.21309	0	0	0	0	0	0	0	0	0
YML118W	NGL3	0	0	0	0	1.88036	1.84592	0	0	0	0	0	0	0
YML123C	PHO84	0	0	0	3.50456	0	0	0	0	1.90693	1.11638	0	0	0
YML124C	TUB3	0	0	0	0	-3.0386	-2.37731	0	0	0	0	0	0	0
YML128C	MSC1	0	0	-2.39427	0	0	0	0	-2.27227	-2.10911	-3.40483	0	0	0
YML130C	ERO1	0	-2.29903	0	0	0	0	0	0	0	-1.47058	0	0	0
YML131W		0	0	0	0	2.43395	2.86136	4.02062	0	0	0	0	2.78519	2.44801
YMR001C	CDC5	0	0	0	0	-1.85998	-3.02382	0	0	0	0	0	0	0
YMR001C-A		0	3.79069	4.80943	4.59575	0	0	3.73806	4.23179	4.10082	3.83995	4.94431	3.49788	0
YMR003W	AIM34	0	0	0	0	-2.27898	0	0	0	0	0	0	0	0
YMR006C	PLB2	0	0	0	-1.8836	0	0	0	0	0	0	0	0	0
YMR009W	ADI1	0	0	0	-1.56726	0	0	0	0	0	0	-2.10855	0	0
YMR011W	HXT2	0	2.35329	0	0	0	2.98522	3.11534	2.74511	3.25805	1.88471	2.55062	2.19453	0
YMR012W	CLU1	0	0	0	0	-2.46468	-2.20955	-2.42816	0	0	0	0	0	-2.36379
YMR014W	BUD22	0	0	0	0	0	0	0	0	1.02455	0	0	0	0
YMR015C	ERG5	0	0	0	0	-3.4167	-3.74797	-3.47887	0	0	0	0	0	-2.54309
YMR016C	SOK2	0	0	0	-1.16988	0	0	0	0	0	0	0	0	0
YMR018W		0	1.45075	0	0	3.76911	3.7827	3.98562	0	0	1.45787	1.69085	2.73678	3.23978
YMR019W	STB4	0	0	0	0	0	0	0	0	0	0	1.56731	0	0
YMR024W	MRPL3	0	0	0	0	-1.88806	0	0	0	0	0	0	-1.04193	-1.863
YMR032W	HOF1	0	0	0	0	0	-3.20396	0	0	0	0	0	0	0
YMR034C		0	1.71105	2.14711	1.52899	0	1.96778	0	0	0	1.48363	2.26917	2.27752	0
YMR036C	MIH1	0	0	0	0	0	2.25069	2.14855	0	0	0	0	1.88642	1.89107
YMR042W	ARG80	0	0	0	0	0	0	0	0	0	1.24016	0	0	0
YMR049C	ERB1	0	0	0	0	0	0	-1.87227	0	0	0	0	0	0
YMR056C	AAC1	0	0	0	0	0	0	0	0	-1.33652	0	0	0	0
YMR058W	FET3	0	0	0	0	0	0	0	0	1.44278	0	0	-1.02853	0
YMR062C	ARG7	0	0	0	0	0	0	0	0	1.27299	0	0	0	0
YMR069W	NAT4	0	0	0	0	4.14456	2.56836	0	0	1.86964	1.78604	0	0	3.95509
YMR081C	ISF1	0	0	0	-1.23736	0	2.20672	0	0	0	0	2.64307	0	0
YMR083W	ADH3	0	0	0	0	0	0	-2.38596	0	0	0	0	0	0
YMR084W		0	0	0	0	0	0	2.07264	0	0	0	0	0	0
YMR085W		0	0	0	0	0	0	1.7138	0	0	0	0	0	0
YMR090W		0	0	0	0	0	0	0	-1.18334	-1.15819	-1.87124	0	0	0
YMR093W	UTP15	0	0	0	0	0	0	-2.35362	0	0	0	0	0	0
YMR094W	CTF13	0	1.77038	0	1.32409	0	0	0	0.976728	1.02254	1.27076	1.58817	0	0
YMR095C	SNO1	0	1.77513	0	1.1627	0	0	0	0	0.928785	1.23317	1.40915	0	0
YMR096W	SNZ1	0	1.83259	0	2.11849	0	0	0	0	0	0	2.15584	0	0
YMR101C	SRT1	0	0	0	0	0	0	3.59918	0	0	0	0	1.70503	2.78698
YMR102C		0	0	0	0	0	0	0	-0.970056	0	0	0	0	0
YMR103C		0	0	0	0	0	0	0	0	0	0	0	1.10986	0
YMR105C	PGM2	0	0	-1.66866	0	0	0	0	-1.99141	-1.86643	-2.6997	0	0	0
YMR107W	SPG4	0	0	0	0	2.83141	3.34908	3.60608	-1.51478	-2.38557	0	0	2.43665	2.7978
YMR114C		0	0	0	0	2.51539	2.6328	2.44803	0	0	0	0	0	2.53729
YMR116C	ASC1	0	0	0	-2.05249	-3.0143	0	-3.2171	0	0	0	0	-1.7478	-3.22037
YMR118C		0	-1.05355	-1.69213	-1.82894	0	0	0	-2.34146	-2.49454	-2.12362	-1.15625	-1.7979	2.16455
YMR120C	ADE17	0	0	0	-1.85815	0	0	-4.55204	0	0	0	0	0	-2.98073
YMR122C		0	0	0	0	2.61213	0	0	0	0	0	0	0	0
YMR122W-A		-0.406662	0	0	0	-2.97107	-3.36279	0	0	0	0	0	0	0
YMR130W		0	0	0	0	0	0	0	0	0	0	0	0	-1.89183
YMR131C	RRB1	0	0	0	0	0	0	-1.79564	0	0	0	0	0	0
YMR142C	RPL13B	0	0	0	-1.98923	0	0	0	0	0	0	0	0	0
YMR143W	RPS16A	0	0	0	-1.65042	0	0	0	0	0	0	-1.50765	0	0
YMR144W		0	0	0	0	0	-2.87812	0	0	0	0	0	0	0
YMR145C	NDE1	0	0	0	0	-3.27399	-2.64565	-2.86621	0	0	0	0	0	-2.6669
YMR147W		0	0	0	0	0	0	2.04338	0	0	0	0	1.34513	0
YMR157C	AIM36	0	0	-1.44084	0	0	0	0	0	0	0	0	0	0
YMR164C	MSS11	0	0	0	0	1.9672	1.84548	1.93371	0	0	0	0	1.31973	0
YMR169C	ALD3	0	-2.77314	-2.61333	-2.81893	0	0	0	-3.44862	-3.12666	-3.6224	-1.63959	-1.22297	0
YMR170C	ALD2	0	0	0	0	0	0	0	-1.58751	-1.47879	-1.32853	0	0	0
YMR174C	PAI3	0	0	-2.2466	-1.69085	0	0	2.23289	-2.11265	-1.93361	-2.72003	0	0	0
YMR175W	SIP18	0	0	-1.72644	-1.42848	2.7057	2.57635	2.55508	-2.83298	-2.37882	-4.27617	0	0	3.50834
YMR175W-A		0	0	0	0	2.89873	2.57187	2.76868	0	0	0	0	0	3.33778
YMR182C	RGM1	0	0	0	0	0	0	0	0	0	0	0	0	1.83338
YMR184W	ADD37	0	0	-1.51115	0	-2.27089	-2.05555	0	0	0	0	0	0	0
YMR188C	MRPS17	0	0	0	0	0	0	0	0	0	0	0	-1.19695	0
YMR189W	GCV2	0	0	0	-1.93997	0	0	0	-1.23794	0	0	0	0	-2.23897
YMR191W	SPG5	0	0	0	0	2.86726	2.83912	0	0	0	0	0	1.72596	0
YMR194C-B	CMC4	0	0	0	0	1.87423	0	0	0	0	0	0	0	0
YMR194W	RPL36A	0	-1.91569	0	-1.57567	-1.92292	0	-1.97353	0	0	0	-1.74771	-1.34334	-1.82553
YMR195W	ICY1	0	0	0	0	0	-2.99637	0	0	0	0	2.36495	-1.96086	0
YMR196W		0	0	0	0	0	0	0	0	0	-1.61828	0	0	0
YMR199W	CLN1	0	0	0	0	-1.75695	-3.12881	0	0	0	0	0	0	-1.82637
YMR202W	ERG2	0	0	0	0	-2.05556	0	0	0	0	0	0	0	-1.93598
YMR206W		0	0	0	0	2.22968	2.66606	2.48812	0	-1.32886	0	0	0	2.70774
YMR215W	GAS3	0	0	0	-1.42571	-2.38522	-2.90448	0	0	0	0	0	-1.2412	-2.48855
YMR217W	GUA1	0	0	0	0	-2.14136	-2.0045	-2.82072	0	0	0	0	0	-2.29508
YMR230W	RPS10B	0	-1.34581	0	-2.11618	0	0	0	0	0	0	-1.76206	-1.26808	0
YMR241W	YHM2	0	0	0	0	-2.99837	-3.26164	-4.19749	0	0	0	0	0	-3.15239
YMR242C	RPL20A	0	-1.85046	0	-2.33718	-2.26295	0	-2.68281	0	0	0	-1.83245	-1.66717	-2.47064
YMR244W		0	-1.61766	0	-1.78334	0	0	-2.16198	0	-1.63174	0	0	0	0
YMR250W	GAD1	0	0	-1.72184	0	0	0	0	-1.97567	-1.31079	-2.91334	0	0	0
YMR251W-A	HOR7	-0.368664	0	0	0	0	0	0	0	0	0	0	0	0
YMR252C		0	0	0	0	0	0	1.94213	0	-1.26863	0	0	0	0
YMR260C	TIF11	0	0	0	0	0	0	-1.9438	0	0	0	0	0	-1.97998
YMR261C	TPS3	0	0	0	0	0	0	0	0	0	-1.17822	0	0	0
YMR267W	PPA2	0	0	-1.40071	0	0	0	0	0	0	0	0	0	0
YMR271C	URA10	0	0	0	0	0	0	0	-1.49183	-1.10078	-1.24503	0	0	0
YMR286W	MRPL33	0	0	-1.50038	0	0	0	0	0	0	0	0	0	0
YMR290C	HAS1	0	0	0	0	0	0	-2.0535	0	0	0	0	0	0
YMR291W		0	-1.3553	-1.75599	-1.62705	0	0	0	0	0	0	0	0	0
YMR300C	ADE4	0	0	0	0	0	0	-2.26205	0	0	0	0	0	-2.08239
YMR303C	ADH2	0	0	0	0	3.10956	0	3.57951	0	0	0	0	2.83767	0
YMR305C	SCW10	0	0	0	0	0	-3.24374	0	0	0	0	0	0	0
YMR306W	FKS3	0	0	0	0	0	0	0	0	0	0	0	0	1.78245
YMR307W	GAS1	0	0	0	0	-4.28648	-3.94986	-3.05198	0	0	0	0	0	0
YMR315W		0	-1.31384	-2.19002	0	0	0	0	-1.12325	0	-1.90081	-1.44189	0	0
YMR316W	DIA1	0	0	1.80459	0	0	0	0	0	0	0	0	1.15581	0
YMR318C	ADH6	0	0	0	-1.22903	0	-1.74626	0	0	0	0	0	0	0
YMR320W		0	0	0	0	0	0	3.00326	0	0	0	0	0	0
YMR321C		0	0	1.59958	0	0	0	-2.90405	0	0	0	0	0	0
YMR322C	SNO4	0	0	0	0	2.33677	0	0	-1.46241	-1.74534	0	0	0	0
YMR323W	ERR3	0	0	0	0	3.10737	0	0	0	-1.66069	0	0	0	4.04698
YMR325W	PAU19	0	0	0	0	0	0	3.68103	0	0	0	0	0	0
YNL009W	IDP3	0	1.67997	0	0	2.71662	2.42046	2.6986	0	0	0	0	1.98686	2.41873
YNL012W	SPO1	0	0	0	0	0	0	0	0	0	0	0	1.05494	0
YNL014W	HEF3	0	0	0	0	3.94021	3.99558	3.64313	-1.7552	-2.05078	0	0	0	4.40049
YNL015W	PBI2	0	0	-1.80996	0	0	0	0	0	0	0	0	0	0
YNL021W	HDA1	0	0	0	0	0	0	-1.76629	0	0	0	0	0	0
YNL024C		0	0	0	0	0	-2.51799	0	0	0	0	-2.10991	0	0
YNL037C	IDH1	0	0	0	0	0	-2.5291	-2.32404	0	0	0	0	0	0
YNL042W	BOP3	0	1.46081	0	0	0	0	0	0	0	0	1.6581	0	0
YNL045W	LAP2	0	0	0	0	0	0	0	-1.24772	-1.23894	0	0	0	0
YNL054W-B		0	0	0	0	0	0	-2.23156	0	0	0	0	0	0
YNL058C		0	0	0	0	0	-2.57333	0	0	0	0	0	0	0
YNL065W	AQR1	0	0	0	0	0	0	0	0	2.19209	0	1.51292	0	0
YNL066W	SUN4	0	-1.92785	-1.35472	-1.60304	-3.20829	-3.63104	-2.33284	-1.63438	0	-2.02771	-1.3858	-2.17902	0
YNL067W	RPL9B	0	0	0	-1.66468	0	0	0	0	0	0	0	0	0
YNL069C	RPL16B	0	-1.71832	0	-2.19588	-2.68621	0	-2.93552	0	0	0	-1.80129	-1.48788	-2.72076
YNL073W	MSK1	0	0	-1.35182	0	0	0	0	0	0	0	0	-1.07599	0
YNL077W	APJ1	0	0	0	0	2.32425	2.31079	0	0	0	0	0	0	0
YNL078W	NIS1	0	0	0	0	0	0	0	-1.15887	0	-1.39298	0	0	0
YNL096C	RPS7B	0	-1.42245	0	-1.55792	-1.93499	0	-2.13925	0	0	0	0	-1.28615	-2.06836
YNL098C	RAS2	0	0	0	0	0	0	0	-1.2091	0	-1.2877	0	-1.39198	0
YNL102W	POL1	0	0	0	0	0	-1.7921	0	0	0	0	0	0	0
YNL111C	CYB5	0	0	0	0	-1.85636	0	-2.15593	0	0	0	0	0	-2.29672
YNL112W	DBP2	0	0	0	0	-2.29396	-2.47257	-4.04546	0	0	0	0	-1.62284	-1.8473
YNL117W	MLS1	0	4.38347	4.14588	4.98226	0	0	-2.16894	2.92239	0	4.74858	4.31192	-1.66149	0
YNL124W	NAF1	0	0	0	0	0	0	0	0	0.962324	0	0	0	0
YNL129W	NRK1	0	0	0	0	0	0	-1.98797	0	0	0	0	0	0
YNL134C		0	0	0	0	0	0	0	0	0	-1.68645	0	0	0
YNL137C	NAM9	0	0	0	0	0	0	0	0	0	0	0	-1.25947	0
YNL141W	AAH1	0	-1.70049	0	-1.71907	-2.44455	-2.15959	-3.25516	0	0	0	0	-1.20852	-2.48121
YNL142W	MEP2	0	0	0	0	-3.51595	-3.96954	-2.847	0	0	0	0	0	-5.0507
YNL143C		0	-2.53421	0	-2.84813	0	0	0	0	0	0	0	0	0
YNL144C		0	0	0	0	2.26521	2.25626	0	0	0	0	0	0	2.31043
YNL145W	MFA2	0	0	-1.70725	-2.999	0	-2.40027	-2.85838	-3.03122	-2.99291	-1.30091	-1.18448	-3.06026	-2.13309
YNL160W	YGP1	0	0	-2.16378	-4.27655	0	0	0	-2.03881	-2.09093	-2.5556	0	-3.54153	0
YNL162W	RPL42A	0.338223	-1.42655	0	-1.53271	-1.98962	0	-1.954	0	0	0	-1.50106	-1.3352	-2.09848
YNL169C	PSD1	0	0	0	0	-4.00292	-3.55663	0	0	0	0	0	-2.04038	0
YNL173C	MDG1	0	0	0	0	0	0	0	-1.20416	0	0	0	0	0
YNL175C	NOP13	0	0	0	0	0	0	-2.05778	0	0	0	0	0	0
YNL178W	RPS3	0	0	0	0	0	0	-2.64147	0	0	0	0	0	0
YNL185C	MRPL19	0	0	-1.67661	0	0	0	0	0	0	0	0	0	0
YNL187W	SWT21	0	0	0	0	0	0	0	0	0	0	0	0	2.0167
YNL194C		0	0	0	-1.63731	0	2.43134	2.44653	-1.98257	-2.06592	-1.50359	0	0	0
YNL195C		0	0	0	-1.874	2.61474	3.76833	3.08351	-1.4962	-2.09876	-1.34481	0	0	2.50765
YNL196C	SLZ1	0	0	0	0	0	0	2.47621	0	0	0	0	0	0
YNL200C		0	0	-1.46179	0	0	0	0	0	0	0	0	0	0
YNL202W	SPS19	0	0	0	0	3.33352	3.13867	3.0846	0	0	0	0	1.91568	2.94877
YNL210W	MER1	0	0	2.37016	0	0	0	0	0	0	0	0	0	0
YNL220W	ADE12	0	0	0	0	0	0	-2.73085	0	0	0	0	0	-2.02409
YNL231C	PDR16	0	0	0	0	-2.23257	-2.55306	-2.57521	0	0	0	0	0	0
YNL234W		0	1.59353	0	0	0	0	0	0	0	0	1.56051	0	0
YNL241C	ZWF1	0	-1.96575	0	0	0	0	0	0	0	0	0	0	0
YNL247W		0	0	0	0	0	0	-1.90766	0	0	0	0	0	0
YNL248C	RPA49	0	-1.46167	0	0	-2.26365	0	-2.56419	0	0	0	0	0	-2.11013
YNL252C	MRPL17	0	0	0	-1.16589	0	0	0	0	0	0	0	0	0
YNL254C	RTC4	0	0	0	0	0	0	2.54841	0	0	0	0	0	0
YNL256W	FOL1	0	-1.101	0	0	0	0	0	0	0	0	0	-1.17305	0
YNL274C	GOR1	0	0	-2.507	0	-2.02023	0	0	-1.13998	0	-2.07826	0	0	0
YNL277W	MET2	0	0	-2.17387	-1.57915	0	0	0	0	0	0	0	0	0
YNL277W-A		0	0	0	0	0	0	0	-1.95264	0	0	-3.84272	0	0
YNL281W	HCH1	0	0	0	0	0	0	0	0	0	0	-1.36224	0	0
YNL289W	PCL1	0	0	0	0	-1.83552	-4.11492	0	0	0	0	0	1.46697	0
YNL300W	TOS6	-0.41836	0	0	0	-3.12558	-4.09749	0	0	0	0	0	1.08833	0
YNL301C	RPL18B	0	-1.5467	0	-1.77926	-2.36497	0	-2.0121	0	0	0	-1.44743	-1.11742	-3.07234
YNL302C	RPS19B	0	0	0	-1.96771	0	0	-2.3545	0	0	0	0	0	-2.16888
YNL311C	SKP2	0	0	0	0	0	0	0	0	0	0	1.25685	0	0
YNL315C	ATP11	0	0	-1.52545	0	0	0	0	0	0	0	0	0	0
YNL320W		0	0	0	0	0	0	0	0	0	0	0	0	-2.3848
YNL327W	EGT2	0	-1.98271	0	0	-2.85744	-4.04764	0	-1.40458	0	-2.42496	0	-1.68301	0
YNL332W	THI12	0	0	-1.99684	0	0	0	0	0	0	0	0	0	0
YNL335W	DDI3	0	0	0	0	0	0	0	0	0	0	0	1.23441	0
YNR002C	ATO2	0	2.3597	0	0	0	0	0	0	0	1.52154	0	0	0
YNR009W	NRM1	0	0	0	0	0	-2.73555	0	0	0	0	0	0	0
YNR017W	TIM23	0	0	0	-1.34707	0	0	0	0	0	0	-1.56033	0	-2.25756
YNR018W	AIM38	-0.443344	0	0	0	0	0	0	0	0	0	0	0	0
YNR022C	MRPL50	0	0	-1.35019	0	0	0	0	0	0	0	0	0	0
YNR030W	ALG12	0	0	0	0	-1.77495	0	0	0	0	0	0	0	-1.80789
YNR034W	SOL1	0	0	0	0	2.02066	0	2.17047	0	0	0	0	0	2.02075
YNR034W-A		0	0	-1.44182	1.83782	0	0	0	-1.39292	-1.51234	-1.84306	2.09185	0	0
YNR037C	RSM19	0	0	-1.46727	0	0	0	0	0	0	0	0	0	0
YNR041C	COQ2	0	0	0	0	-2.20633	-1.94176	-2.11099	0	0	0	0	0	-2.57744
YNR043W	MVD1	0	0	0	0	-2.47982	-1.91677	0	0	0	0	0	0	0
YNR044W	AGA1	0	-1.26073	0	0	0	0	-2.03697	-1.50829	-1.71908	-1.37225	-1.68905	0	0
YNR050C	LYS9	0	0	-2.88348	-2.30108	-4.73174	-4.19059	-4.17043	0	0	0	0	-2.21467	-4.17862
YNR053C	NOG2	0	0	0	0	0	0	-2.14354	0	0	0	0	0	0
YNR057C	BIO4	0	0	0	0	0	0	0	0	0	1.07499	0	0	0
YNR058W	BIO3	0	0	0	0	0	0	0	0	0	1.42452	1.33002	1.16786	0
YNR060W	FRE4	0	0	0	0	2.08581	0	0	0	0	0	0	0	0
YNR067C	DSE4	0	-2.19061	-1.5852	-2.81239	-2.84065	-3.47277	-2.13797	-2.53925	0	-3.02303	0	-2.30751	0
YNR068C		0	0	0	1.69706	0	0	0	0	0	0	2.30156	0	0
YNR069C	BSC5	0	0	0	1.89802	0	0	0	0	0	0	2.63574	0	0
YNR073C		0	0	0	0	0	0	3.01992	0	0	0	0	0	0
YNR075W	COS10	0	0	0	0	0	0	0	0	0	0	-1.51317	0	0
YOL005C	RPB11	0	0	0	0	0	0	0	0	0	0	-1.18968	0	0
YOL015W	IRC10	0	0	0	0	0	0	2.45661	0	0	0	0	0	0
YOL019W		0	0	0	0	-1.91263	-2.80876	0	0	0	0	0	0	0
YOL023W	IFM1	0	0	-1.55036	0	0	0	0	0	0	0	0	-1.36984	0
YOL024W		0	0	0	0	0	0	0	0	0	0	0	-2.10335	0
YOL028C	YAP7	0	0	0	0	0	0	0	0	0	0	0	0	-2.19626
YOL030W	GAS5	0	0	0	0	-2.32037	-1.97347	0	0	0	0	0	0	0
YOL031C	SIL1	0	0	0	0	-2.35857	-2.01218	-2.66428	0	0	0	0	0	-2.18756
YOL033W	MSE1	0	0	-1.40714	0	0	0	0	0	0	0	0	0	0
YOL039W	RPP2A	0	-1.48435	0	-2.52113	-2.04368	0	-2.75014	0	0	0	-1.7314	-1.46386	-2.69207
YOL040C	RPS15	0	0	0	-2.08094	0	0	-2.69254	0	0	0	0	0	-2.49842
YOL047C		0	0	0	-1.31737	0	0	1.83349	0	-1.23831	-1.45993	0	0	0
YOL048C	RRT8	0	0	0	0	0	0	0	-1.04017	-1.10721	0	0	0	0
YOL052C	SPE2	0	0	0	-1.24243	0	0	0	0	0	0	0	0	0
YOL052C-A	DDR2	-0.567175	0	-1.9286	-1.83818	0	0	0	-2.27964	-1.78225	-2.94661	0	0	0
YOL058W	ARG1	0	0	2.05172	2.86435	0	-1.94488	-2.06918	0	1.26424	0	3.3986	0	0
YOL076W	MDM20	0	0	0	0	0	-1.86344	0	0	0	0	0	0	0
YOL077C	BRX1	0	0	0	0	0	0	-2.11233	0	0	0	0	0	-1.80454
YOL077W-A	ATP19	0	0	0	0	0	-1.94091	-1.69439	0	0	0	0	0	0
YOL083W	ATG34	0	0	-1.70792	0	0	0	0	0	0	0	0	0	0
YOL084W	PHM7	0	0	0	0	0	0	0	-2.40532	-2.16208	-2.74422	0	0	0
YOL085W-A		0	0	0	0	2.50864	2.30752	0	0	0	0	0	0	2.9122
YOL086C	ADH1	0	-2.74395	-3.36029	-2.58134	0	0	0	-2.94834	0	-3.28962	0	0	0
YOL097C	WRS1	0	-1.21059	0	0	-2.03862	0	0	0	0	0	0	0	-1.83698
YOL101C	IZH4	0	0	-1.59293	-1.35306	0	0	2.18024	1.16274	0	0	0	0	0
YOL103W-B		0	0	0	0	0	0	0	0	-1.32416	0	0	0	0
YOL104C	NDJ1	0	0	0	0	0	0	-2.00775	0	-3.69313	0	0	0	-3.37716
YOL105C	WSC3	0	0	0	0	0	0	0	0	-0.921156	0	0	0	0
YOL107W		0	0	0	0	-2.38608	-1.83947	0	0	0	0	0	0	-1.83549
YOL110W	SHR5	0	1.44135	0	0	0	0	0	0	0	0	0	1.40601	0
YOL119C	MCH4	0	0	0	2.23297	0	0	0	0	0	0	1.6398	0	0
YOL120C	RPL18A	0	0	0	-2.00365	0	0	-2.46675	0	0	0	0	0	-2.61245
YOL121C	RPS19A	0	-1.52266	0	-2.15111	-2.48306	-1.92444	-2.56926	0	0	0	-1.7956	-1.38017	-2.46626
YOL124C	TRM11	0	0	0	0	0	-1.79464	-2.10834	0	0	0	0	0	0
YOL125W	TRM13	0	1.66923	1.65527	1.61416	0	0	0	0	0	1.70294	0	0	0
YOL126C	MDH2	0	2.51652	0	2.36009	0	0	0	0	-1.59284	2.58621	0	0	0
YOL127W	RPL25	0	0	0	-1.77369	0	0	0	0	0	0	0	0	0
YOL131W		0	0	0	0	0	0	4.09399	0	0	0	0	0	2.74772
YOL136C	PFK27	0	0	0	0	0	0	2.29215	2.8907	0	0	0	0	0
YOL140W	ARG8	0	0	1.55633	1.58875	0	0	0	0	0	0	0	0	0
YOL151W	GRE2	0	0	-1.77418	0	0	0	0	-1.85706	-1.11992	-2.67019	-1.21266	0	0
YOL152W	FRE7	0	0	-1.38524	0	0	0	0	0	0	0	0	0	0
YOL153C		0	0	0	0	0	0	0	-1.08033	-0.953844	-1.18064	0	0	0
YOL154W	ZPS1	0	0	0	0	0	0	5.09195	0	0	0	2.05567	1.62128	2.23618
YOL155C	HPF1	0	0	0	0	0	3.23721	3.41493	0	1.78559	0	4.72658	4.19274	5.20986
YOL155W-A		0	-2.10732	0	0	-2.78833	0	-3.73246	0	0	0	0	0	0
YOL156W	HXT11	0	0	0	0	1.88927	0	0	0	0	0	0	0	0
YOL157C	IMA2	0	0	0	0	1.89938	0	2.30222	0	0	0	0	1.34474	0
YOL158C	ENB1	0	0	0	0	0	0	0	0	0	0	1.42814	0	2.38928
YOL161C	PAU20	0	4.02873	0	0	0	0	0	0	0	0	0	0	0
YOL162W		0	0	0	0	0	0	0	0	0	0	-1.77191	0	0
YOL163W		0	0	0	0	0	0	0	0	0	0	-1.53366	0	0
YOL164W	BDS1	0	0	-3.39711	-1.91578	0	0	0	-1.38904	-2.3882	-1.68752	-2.67579	0	0
YOR010C	TIR2	0	4.08186	0	0	2.26849	0	0	0	0	0	0	0	0
YOR011W	AUS1	0	1.44164	0	0	0	0	0	0	0	0	0	0	0
YOR011W-A		0	0	0	0	2.47331	0	0	0	0	0	0	0	0
YOR018W	ROD1	0	0	0	0	0	0	0	0	0	-1.06319	0	0	0
YOR019W		0	0	0	0	2.2924	2.97369	1.91916	0	0	0	0	0	1.75044
YOR025W	HST3	0	0	0	0	0	-2.25351	0	0	0	-1.02777	0	0	0
YOR028C	CIN5	0	0	-2.07851	-1.7653	0	0	0	-2.13123	-2.4755	-2.49531	-1.47265	-1.55522	0
YOR031W	CRS5	0	0	0	0	1.97562	3.01363	3.09858	0	-1.11631	0	0	0	2.44495
YOR032C	HMS1	0	0	0	0	2.19581	1.90685	0	0	0	0	0	0	2.91854
YOR040W	GLO4	0	0	0	0	2.35847	1.98194	1.93601	0	0	0	0	0	0
YOR045W	TOM6	0	0	-1.37728	0	0	0	0	0	0	0	0	0	0
YOR047C	STD1	0	1.57864	0	0	2.1199	0	0	0	1.15885	0	1.64498	0	0
YOR058C	ASE1	0	0	0	1.149	0	0	0	0	0	0	0	0	0
YOR062C		0	1.76445	0	0	2.14546	2.46014	0	0	0	0	0	0	0
YOR071C	NRT1	0	0	0	0	0	0	0	0	0	0	1.39995	0	0
YOR074C	CDC21	0	0	0	0	0	-2.13967	0	0	0	0	0	0	0
YOR083W	WHI5	0	2.36863	2.08855	0	2.56271	2.34376	0	1.54075	1.71328	1.67778	2.14291	1.88069	2.35365
YOR084W	LPX1	0	2.70853	2.11246	1.89451	2.23409	1.98087	2.34458	1.97333	1.90357	3.36284	2.22523	1.89667	2.61031
YOR092W	ECM3	0	0	0	0	0	0	-1.8725	0	0	-1.24108	0	0	0
YOR095C	RKI1	0	1.85076	1.38858	1.184	0	0	-2.82699	1.24965	0	2.19497	0	-1.3011	-2.09808
YOR096W	RPS7A	0	0	0	-2.0556	0	0	-2.3914	0	0	0	-1.71079	0	-2.48824
YOR099W	KTR1	0	0	0	0	0	0	0	0	0	0	-1.96279	0	0
YOR100C	CRC1	0	4.04805	4.72285	4.57866	0	0	0	2.50743	0	3.76644	3.94318	0	0
YOR101W	RAS1	0	0	0	0	0	0	0	0	0	0	-1.25989	-1.64716	0
YOR107W	RGS2	0	0	0	0	1.8638	2.03222	0	0	0	0	0	0	0
YOR108W	LEU9	0	0	0	0	-2.6508	-2.60854	-2.76675	0	0	0	0	-1.22669	-2.63837
YOR113W	AZF1	0	0	0	1.35168	0	0	0	0	0	0	0	0	0
YOR120W	GCY1	0	0	-2.31367	0	0	0	0	0	0	-2.78748	0	0	0
YOR130C	ORT1	0	0	0	0	0	0	-2.01014	0	0	0	0	0	0
YOR134W	BAG7	0	0	0	-1.77986	0	0	2.45708	0	-1.85543	-1.11911	0	0	0
YOR136W	IDH2	0	0	0	0	-2.8555	-3.50164	-2.8356	0	0	0	0	0	0
YOR161C	PNS1	0	-1.58444	-2.26828	-2.69686	0	0	0	-2.58286	-1.62512	-3.12324	-2.23908	0	0
YOR167C	RPS28A	0	-1.43399	0	-1.57518	-1.96691	0	-1.99896	0	0	0	-1.72591	0	-2.30962
YOR173W	DCS2	0	0	-1.74222	0	0	0	0	-1.56447	-1.46999	-2.15943	0	0	0
YOR176W	HEM15	0	0	-1.43326	0	0	0	0	0	0	0	0	0	0
YOR180C	DCI1	0	1.22692	0	0	2.09797	1.71534	2.93254	0	0	0	0	1.33209	0
YOR181W	LAS17	0	1.33518	1.45578	1.16968	0	0	0	1.33469	1.21771	1.0184	1.24565	1.22595	0
YOR182C	RPS30B	0	-1.20069	0	-1.3151	0	0	0	0	0	0	-1.29144	0	0
YOR185C	GSP2	0	0	-1.59563	0	0	0	0	-1.25191	-1.02025	-1.4279	0	0	0
YOR186W		0	0	0	0	0	0	2.51901	-2.91196	-1.77974	-2.09653	0	0	3.50194
YOR187W	TUF1	0	0	0	0	-2.31865	0	-2.3508	0	0	0	0	0	0
YOR192C-B		0	0	0	0	0	0	0	-1.54656	0	-2.24528	0	0	0
YOR198C	BFR1	0	0	-1.45102	0	-2.93285	-2.27883	-2.52534	0	0	0	0	0	-2.70112
YOR208W	PTP2	0	0	0	0	0	0	0	0	0	0	0	1.17331	0
YOR212W	STE4	0	0	0	-1.95494	-1.88306	0	-2.07743	0	0	0	0	-1.37409	0
YOR214C		0	0	0	0	0	0	0	-1.97071	-2.05154	0	0	0	0
YOR222W	ODC2	0	0	0	0	-2.59529	-3.07028	-3.77476	0	0	0	0	0	-2.68549
YOR224C	RPB8	0	-1.07668	0	0	0	0	0	0	0	0	0	0	0
YOR226C	ISU2	-0.652264	0	0	0	0	0	0	0	0	0	0	0	0
YOR232W	MGE1	0	0	0	0	-1.8905	0	-1.76265	0	0	0	0	0	-1.99078
YOR234C	RPL33B	0	-1.39562	0	-1.85119	-2.04361	0	-2.21268	0	0	0	-1.44521	-1.09219	-2.21344
YOR237W	HES1	0	0	0	0	0	-3.32055	-3.56489	0	0	0	0	0	0
YOR242C	SSP2	0	0	1.85861	0	0	0	0	0	0	0	0	0	0
YOR247W	SRL1	0	0	0	0	0	-3.43718	0	0	0	0	0	0	0
YOR252W	TMA16	0	0	0	0	0	0	0	0	0	1.05617	0	0	0
YOR254C	SEC63	0	0	0	0	0	0	0	0	0	0	0	0	-1.96192
YOR255W	OSW1	0	0	-2.82768	0	0	-2.39531	0	-1.88196	-3.44495	0	0	0	0
YOR264W	DSE3	0	-1.57855	-1.67028	-1.49132	0	-2.03817	0	-1.72698	0	-2.01129	0	-1.70884	0
YOR268C		0	0	0	0	2.56031	0	0	0	0	0	0	0	3.94426
YOR271C	FSF1	0	0	0	0	0	0	0	0	0	0	0	0	-1.92808
YOR286W	RDL2	0	0	-1.49026	-1.12178	0	0	0	0	0	0	0	0	0
YOR288C	MPD1	0	0	-1.65719	-1.24935	-2.94468	-2.63373	-1.92527	-1.00414	0	-1.43654	0	-1.24141	-1.85546
YOR293W	RPS10A	0	-1.49483	0	-2.28186	0	0	-2.7152	0	0	0	-1.92093	-1.46978	-2.3659
YOR294W	RRS1	0	0	0	0	0	0	0	0	0	1.22316	0	0	0
YOR302W		0	-2.5232	0	0	-1.97722	0	0	-1.42665	-1.84079	-2.31335	0	-1.0613	0
YOR303W	CPA1	0	-2.31363	0	0	0	0	0	0	-1.73127	-2.18477	0	0	0
YOR310C	NOP58	0	0	0	0	-2.33227	-1.97007	-2.97711	0	0	0	0	0	-2.4
YOR313C	SPS4	0	-1.50598	0	-2.05536	-3.4977	-2.94794	-3.65011	-2.13612	0	0	0	-3.86729	0
YOR314W		0	0	0	0	0	-3.72505	-3.37412	-2.81477	0	0	0	0	0
YOR315W	SFG1	0	-2.31464	0	0	-3.91061	-2.80565	-3.68816	-1.47943	0	0	-1.66845	-2.90706	-2.64588
YOR316C-A		0	-2.36413	0	0	0	0	0	-4.0413	0	-3.56434	0	-2.65116	-4.10668
YOR328W	PDR10	0	0	0	0	0	2.2345	2.42523	0	0	0	0	0	2.18751
YOR337W	TEA1	0	0	0	0	0	0	0	0	0	0	1.59671	0	0
YOR338W		0	0	0	0	0	2.15862	0	0	0	0	0	1.65922	0
YOR340C	RPA43	0	-1.082	0	0	-1.84999	0	0	0	0	0	0	0	0
YOR342C		0	0	0	-1.20275	0	0	0	0	0	0	0	0	0
YOR343C		-1.261	0	0	0	0	0	0	0	0	0	0	0	0
YOR343W-B		0	0	0	0	0	0	0	-1.28931	0	-1.77407	0	0	0
YOR344C	TYE7	0	0	-2.26724	-2.18592	0	0	0	0	0	0	0	0	0
YOR347C	PYK2	0	0	-1.28475	0	0	-1.77248	-2.47652	-1.12646	-1.29363	0	0	-1.03251	0
YOR349W	CIN1	0	1.20081	0	0	0	0	0	0	0	0	0	0	0
YOR351C	MEK1	0	0	0	0	0	0	0	0	0	0	0	0	2.21478
YOR355W	GDS1	0	0	0	-1.49847	0	0	0	0	0	0	0	0	0
YOR365C		0	0	0	1.31679	0	0	0	0	0	0	0	0	0
YOR369C	RPS12	0	0	0	-2.12759	0	0	-2.44498	0	0	0	0	0	0
YOR375C	GDH1	0	0	0	0	0	0	-2.78359	0	0	0	0	0	-3.61789
YOR378W		0	0	0	0	0	0	0	0	0	0	0	0	1.98594
YOR382W	FIT2	0	1.53102	0	0	0	0	0	0	0	0	0	0	1.9812
YOR383C	FIT3	-0.511111	0	0	0	0	0	1.72541	0	0	0	0	0	2.68205
YOR385W		0	0	0	0	0	0	0	0	0	0	0	1.28746	0
YOR387C		0	0	0	0	0	0	0	0	0	0	0	-1.53551	0
YOR388C	FDH1	0	0	0	0	4.10224	3.22352	4.56713	0	0	0	0	2.35124	5.2313
YOR389W		0	1.08703	0	0	1.87594	0	0	0	0	0	1.16122	0	0
YOR391C	HSP33	0	0	0	0	2.34987	1.67401	1.8657	-1.58013	-1.31599	-1.32987	0	0	2.04566
YOR393W	ERR1	0	0	0	0	3.06111	0	0	-1.32213	-1.52506	0	0	0	4.09493
YPL003W	ULA1	0	0	0	0	0	0	0	0	0	-1.29309	0	0	0
YPL004C	LSP1	0	0	0	0	0	0	0	0	0	-1.9149	0	0	0
YPL006W	NCR1	0	0	0	0	0	0	0	0	-1.00796	0	0	0	0
YPL021W	ECM23	0	0	0	0	0	0	0	0	0	0	0	0	4.82581
YPL026C	SKS1	0	1.33228	0	0	0	0	0	0	1.04588	1.37331	0	0	0
YPL027W	SMA1	0	0	0	0	2.40698	0	0	0	0	0	0	0	0
YPL032C	SVL3	0	0	0	0	0	0	-1.98857	0	0	0	0	0	0
YPL033C	SRL4	0	0	0	3.11009	4.30872	2.36693	2.18576	0	0	0	3.5297	1.96388	0
YPL036W	PMA2	0	0	-1.50433	-1.36156	0	0	0	-2.6225	-2.05867	-1.80675	0	0	3.40519
YPL038W-A		0	0	0	0	0	0	0	0	0	0	4.32599	0	0
YPL056C	LCL1	0	0	1.7363	0	2.06231	0	0	0	0	0	0	1.43474	2.24173
YPL058C	PDR12	0	0	1.39068	1.27684	0	0	0	0	1.12345	0	1.20795	0	0
YPL060C-A		0	0	0	0	2.32997	0	0	0	0	0	0	0	2.31694
YPL067C		0	0	0	0	-2.16292	-1.93614	0	0	0	0	0	0	0
YPL075W	GCR1	0	-1.0621	0	0	0	0	0	-1.12787	0	-1.38563	0	0	0
YPL079W	RPL21B	0	0	0	-1.87375	0	0	0	0	0	0	-1.63466	0	-2.14792
YPL080C		0	0	2.4668	0	0	0	0	0	0	0	0	0	0
YPL081W	RPS9A	0	-1.5834	0	-1.74631	-2.82437	-1.91338	-2.961	0	0	0	-1.64442	-1.37986	-2.85987
YPL087W	YDC1	0	0	-1.4365	0	0	0	0	0	0	0	0	0	0
YPL092W	SSU1	0	0	0	0	0	0	0	-1.56255	-1.07316	0	0	0	0
YPL097W	MSY1	0	0	-1.4251	0	0	0	0	0	0	0	0	0	0
YPL103C	FMP30	0	0	0	0	-2.24368	-2.02424	0	0	0	0	0	0	0
YPL111W	CAR1	0	0	0	0	0	0	1.9834	1.21882	1.88677	0	0	1.89248	0
YPL113C		0	0	0	0	0	0	0	0	-1.02256	0	0	0	0
YPL119C	DBP1	0	1.26596	0	0	2.39763	0	2.5714	0	0	0	0	0	2.30542
YPL119C-A		0	2.09292	0	0	3.06904	2.58819	3.39849	0	0	0	1.66258	1.48285	2.54923
YPL123C	RNY1	0	0	0	0	0	0	0	0	-1.1457	0	0	0	0
YPL131W	RPL5	0	0	0	-2.0711	0	0	-3.19413	0	0	0	0	0	-2.68264
YPL132W	COX11	0	0	-1.40076	0	0	0	0	0	0	0	0	-1.10426	0
YPL134C	ODC1	0	1.87386	0	0	0	0	0	1.33275	0	2.12287	0	0	0
YPL137C	GIP3	0	0	0	-1.2617	0	0	0	0	0	0	0	0	0
YPL147W	PXA1	0	1.6746	0	0	2.82286	2.68775	3.21476	0	0	0	0	2.01975	2.64515
YPL151C	PRP46	0	0	0	0	2.18273	0	0	0	0	0	0	0	0
YPL155C	KIP2	0	0	0	0	0	-2.30602	0	0	0	0	0	0	0
YPL156C	PRM4	0	2.19721	1.36934	0	0	0	2.08387	0	0	1.42574	0	1.22495	0
YPL163C	SVS1	0	0	0	0	0	0	0	0	0	0	0	1.57548	0
YPL172C	COX10	0	0	-1.45027	0	-2.10094	-2.30673	-1.88921	0	0	0	0	-1.40766	-2.79196
YPL173W	MRPL40	0	0	-1.51608	0	0	0	0	0	0	0	0	0	0
YPL177C	CUP9	0	0	0	0	0	0	0	-1.38449	-1.47244	0	0	0	0
YPL183W-A	RTC6	0	0	-1.54067	-1.15369	0	0	0	0	0	0	0	0	0
YPL186C	UIP4	0	0	-2.33374	0	0	0	0	-1.96864	-1.64112	-2.11805	0	0	0
YPL187W	MF(ALPHA)1	0	-2.79691	-5.9702	-3.2326	-3.29775	-3.97468	-5.02978	-2.95235	-3.14318	-2.01946	-2.80666	-2.53165	-2.96899
YPL197C		0	0	0	-4.01622	0	0	0	0	0	0	0	0	0
YPL198W	RPL7B	0	-1.59001	0	-2.28241	0	0	0	0	0	0	-1.80848	0	-2.38342
YPL200W	CSM4	0	2.42169	0	0	3.34997	2.43169	4.12787	1.38928	0	1.9428	0	1.96017	2.49655
YPL201C	YIG1	0	2.08934	0	0	2.29365	2.33174	3.12385	1.66609	0	2.11398	0	1.73464	2.49541
YPL212C	PUS1	0	0	0	0	-2.16979	0	-2.59279	0	0	0	0	0	0
YPL215W	CBP3	0	0	0	0	-2.03474	-1.70702	-1.82134	0	0	0	0	0	-1.91854
YPL222W	FMP40	0	0	0	0	0	0	0	0	-1.09064	0	0	0	0
YPL223C	GRE1	0	-2.36758	-2.75903	-4.65538	0	3.49714	3.15582	-4.62804	-4.42302	-4.21092	-2.50022	0	4.39356
YPL227C	ALG5	0	0	0	0	-2.14077	-2.22194	0	0	0	0	0	0	-2.19241
YPL230W	USV1	0	0	0	0	0	0	0	0	0	-1.74106	0	0	0
YPL240C	HSP82	0	0	0	0	0	0	0	0	-1.39991	0	0	0	0
YPL241C	CIN2	0	0	0	0	-2.22715	-2.20874	0	0	0	0	0	0	0
YPL245W		0	0	0	0	0	0	-2.33964	0	0	0	0	0	0
YPL246C	RBD2	0	0	0	0	-2.01686	-2.32222	0	0	0	0	0	0	0
YPL247C		0	0	0	0	0	0	0	0	0	-1.0265	0	0	0
YPL249C-A	RPL36B	0	0	0	-2.3853	0	0	0	0	0	0	0	0	0
YPL250C	ICY2	0	0	0	1.66572	0	0	0	-1.14991	0	0	2.15552	1.21346	0
YPL255W	BBP1	0	0	0	0	0	-2.21552	0	0	0	0	0	0	0
YPL256C	CLN2	0	0	0	-1.53284	-2.79465	-3.2914	-2.0892	0	0	0	0	0	-1.89661
YPL257W		0	0	0	0	0	0	1.78613	0	0	0	0	0	0
YPL257W-B		0	0	0	0	0	0	-2.15459	0	-1.4503	0	0	0	0
YPL263C	KEL3	0	0	0	0	-2.96772	-2.38239	-2.9193	0	0	0	0	0	-1.86645
YPL265W	DIP5	0	4.3955	1.58888	2.3003	0	0	0	1.87657	2.59613	1.73471	3.8357	2.3623	0
YPL269W	KAR9	0	0	0	1.54542	0	0	0	0	0	0	0	0	0
YPL273W	SAM4	0	0	1.41961	0	-2.25169	-1.82439	-2.53459	0	1.19349	0	0	0	-2.03008
YPL275W	FDH2	0	0	0	0	3.84659	3.30635	4.13303	0	0	0	0	1.71464	4.91224
YPL276W		0	0	0	0	3.62914	0	0	0	0	0	0	0	4.25803
YPL277C		0	1.27592	0	0	1.93826	0	2.00715	0	0	0	1.53586	0	2.91192
YPL278C		0	0	0	0	0	0	0	0	0	0	0	0	2.1427
YPL280W	HSP32	0	0	0	0	2.29357	0	1.89391	-1.44772	-1.58889	0	0	0	1.95807
YPL281C	ERR2	0	0	0	0	3.06111	0	0	-1.32213	-1.52506	0	0	0	4.09493
YPR001W	CIT3	0	3.77268	2.03889	0	3.86363	0	2.67773	0	0	2.9577	2.0759	1.92635	3.42621
YPR002W	PDH1	0	2.73646	0	0	0	0	0	0	0	2.35882	0	0	0
YPR006C	ICL2	0	3.58262	1.59323	0	2.18708	0	0	1.41733	1.08395	3.1695	0	1.9468	0
YPR009W	SUT2	0	1.77493	1.34792	0	0	1.74074	0	0	0	1.65441	1.68265	1.10647	0
YPR010C	RPA135	0	0	0	0	0	0	-2.1922	0	0	0	0	0	0
YPR013C		0	1.37922	0	0	0	0	1.8354	0	0	0	1.59379	0	0
YPR014C		0	0	0	0	0	0	0	0	0	0	1.88314	0	0
YPR020W	ATP20	0	0	0	0	-1.9773	-1.9585	0	0	0	0	0	0	-1.77278
YPR021C	AGC1	0	0	0	0	-1.99445	-1.78893	0	0	0	0	0	0	0
YPR027C		0	0	0	-1.65576	0	0	2.54598	1.04013	0	0	0	0	0
YPR033C	HTS1	0	0	0	0	-2.59583	-2.25991	-2.31825	0	0	0	0	0	-2.44373
YPR036W-A		-0.413805	0	0	0	0	0	0	0	0	0	0	0	0
YPR044C	OPI11	0	0	0	-2.03235	0	0	0	0	0	0	0	0	0
YPR047W	MSF1	0	0	0	0	0	0	-1.82519	0	0	0	0	0	0
YPR060C	ARO7	0	0	0	0	-2.19448	0	-2.09176	0	0	0	0	0	0
YPR069C	SPE3	0	0	0	0	0	0	0	0	0	0	0	0	-2.22232
YPR074C	TKL1	0	0	0	0	-6.07957	-3.97865	-5.38868	0	0	0	0	0	-4.24724
YPR078C		0	0	0	0	0	0	0	0	0	0	0	1.17788	0
YPR083W	MDM36	0	1.35435	0	0	0	0	0	0	0	1.09705	0	0	0
YPR093C	ASR1	0	0	0	0	0	0	0	0	0	0	0	0	1.74715
YPR096C		0	0	2.43145	0	0	0	0	0	0	0	0	0	0
YPR102C	RPL11A	0	0	0	-1.97151	-2.46137	0	-2.32247	0	0	0	-1.6506	0	-2.80359
YPR108W-A		0	0	0	0	3.44253	0	0	0	0	0	0	0	0
YPR111W	DBF20	0	0	0	0	0	0	0	0	0	0	1.21617	0	0
YPR112C	MRD1	0	0	0	0	0	0	0	0.950464	0	0	0	0	0
YPR113W	PIS1	0	-1.50173	-1.29569	-1.16992	0	0	0	0	0	-1.50584	-1.17016	0	0
YPR116W	RRG8	0	0	0	0	0	0	0	0	0	0	1.89047	0	0
YPR119W	CLB2	0	0	0	0	-2.52482	-3.53042	0	0	0	-1.57924	0	0	0
YPR127W		0	0	0	0	0	0	0	-0.997201	0	-1.15757	0	0	0
YPR132W	RPS23B	0	0	0	-1.76929	0	0	0	0	0	0	0	0	0
YPR133W-A	TOM5	0	0	0	0	0	0	0	0	0	0	0	0	-1.99579
YPR137C-B		0	0	0	0	0	0	-2.10899	-1.19249	-1.18014	0	0	0	0
YPR137W	RRP9	0	0	0	0	0	0	-1.90002	0	0	0	0	0	0
YPR138C	MEP3	0	0	0	0	0	0	0	0	0	0	0	0	-1.90313
YPR145W	ASN1	0	0	0	0	-3.50779	-2.6619	-4.0769	0	1.3536	0	0	0	-3.22657
YPR154W	PIN3	0	0	0	0	0	0	0	0	0	0	0	1.23068	0
YPR158C-D		0	0	0	0	0	0	-2.25134	-1.20377	-0.972716	-1.04916	0	0	0
YPR158W	CUR1	0	0	0	-1.1768	0	0	0	-1.10266	0	-1.10273	-1.40254	0	0
YPR158W-B		0	0	0	0	0	0	-1.94209	0	-0.962928	0	0	0	0
YPR159W	KRE6	0	0	0	0	-2.41781	-2.04907	-2.09225	0	0	0	0	0	0
YPR160W	GPH1	0	0	-2.27602	0	0	0	0	-1.51278	-1.45835	-3.77829	0	0	0
YPR166C	MRP2	0	0	-1.40533	0	0	0	0	0	0	0	0	0	0
YPR167C	MET16	0	-1.30574	-1.35523	0	-2.03024	-1.88505	-2.72401	0	0	0	0	0	0
YPR174C		0	0	0	0	1.92798	0	0	0	0	0	0	0	1.97223
YPR184W	GDB1	0	0	0	0	0	0	0	0	-1.34992	-2.10382	0	0	0
YPR192W	AQY1	0	1.37033	0	0	0	0	0	0	0	0	0	0	0
YPR193C	HPA2	0	1.41245	0	0	0	0	0	0	0	0	0	0	0
YPR201W	ARR3	0	0	0	0	2.14795	1.78687	0	0	0	0	0	0	0
YPR202W		0	1.5526	0	1.49317	0	0	0	0	0	0	1.6832	0	0
snR11	SNR11	-0.625634	0	0	0	0	0	0	0	0	0	0	0	0
snR17a	SNR17A	0	0	2.31937	2.22339	2.4993	0	0	0	0	0	2.13408	0	0
snR19	SNR19	0	0	0	0	4.77218	4.1131	3.61291	0	0	0	0	2.36459	4.8417
snR190	SNR190	0	0	0	0	0	0	0	0	0	0	0	0	3.71689
snR34	SNR34	0	0	0	0	0	0	3.74242	0	0	0	0	0	0
snR35	SNR35	0	0	2.31022	0	0	0	0	0	0	0	0	0	0
snR36	SNR36	0	0	2.28669	0	0	0	0	0	0	0	0	0	0
snR37	SNR37	0	0	0	0	0	0	0	0	0	0	0	2.51506	0
snR41	SNR41	0	0	0	0	0	0	2.34585	0	0	0	0	0	0
snR42	SNR42	0	0	0	0	3.00999	2.329	0	0	0	0	0	1.97361	2.62243
snR46	SNR46	0	0	2.81581	0	0	0	0	0	0	0	0	0	0
snR51	SNR51	0	0	0	0	2.82022	2.45868	2.71715	0	0	0	0	0	0
snR55	SNR55	0	0	0	0	5.10865	0	0	0	0	0	0	0	5.22048
snR57	SNR57	0	0	0	0	3.68043	0	0	0	0	0	0	0	3.85188
snR63	SNR63	0	-2.45284	0	0	0	0	-3.95234	0	0	0	0	0	0
snR70	SNR70	0	0	0	0	0	0	2.33624	0	0	0	0	0	0
snR74	SNR74	0	0	0	0	0	3.15004	0	0	0	0	0	0	0
snR86	SNR86	0	0	0	0	2.8457	2.96034	1.96881	0	0	0	0	0	3.30111
snR9	SNR9	0	0	0	0	1.99718	0	0	0	0	0	0	0	0
